# Supplementary material
Source: publisher figshare collection journal article supplement (https://acs.figshare.com/ndownloader/files/4290265)
Supplement: Supplementary file 1 [file 4290265]

## Supporting Information

# Iridoid and Phenylethanoid Glucosides from *Veronica (sect. Hebe) lavaudiana*

Rilka M. Taskova,<sup>†</sup> Tetsuo Kokubun,<sup>‡</sup> Ken G. Ryan,<sup>†</sup> Phil J. Garnock-Jones,<sup>†</sup> and

Søren Rosendal Jensen,<sup>\*, §</sup>

<sup>†</sup>*School of Biological Sciences, Victoria University of Wellington, PO Box 600,  
Wellington 6140, New Zealand*

<sup>‡</sup>*Jodrell Laboratory, Royal Botanic Gardens, Kew, Richmond, Surrey TW9 3DS, UK*

<sup>§</sup>*Department of Chemistry, The Technical University of Denmark, DK-2800, Lyngby,  
Denmark.*

---

\* To whom correspondence should be addressed. Tel.: +45 45252103. Fax: +45 45933968

E-mail: [srj@kemi.dtu.dk](mailto:srj@kemi.dtu.dk).

## List of Supporting Information

|            |                                                                                               | Page |
|------------|-----------------------------------------------------------------------------------------------|------|
| Figure S1  | <sup>1</sup> H NMR (CD <sub>3</sub> OD, 500 MHz) of lavaudioside A ( <b>2a</b> )              | 3    |
| Figure S2  | <sup>13</sup> C NMR (CD <sub>3</sub> OD, 125 MHz) of lavaudioside A ( <b>2a</b> )             | 4    |
| Figure S3  | <sup>1</sup> H NMR (CD <sub>3</sub> OD, 500 MHz) of lavaudioside B ( <b>3a</b> )              | 5    |
| Figure S4  | <sup>13</sup> C NMR (CD <sub>3</sub> OD, 125 MHz) of lavaudioside B ( <b>3a</b> )             | 6    |
| Figure S5  | <sup>1</sup> H NMR (CD <sub>3</sub> OD, 500 MHz) of lavaudioside C ( <b>4</b> )               | 7    |
| Figure S6  | <sup>13</sup> C NMR (CD <sub>3</sub> OD, 125 MHz) of lavaudioside C ( <b>4</b> )              | 8    |
| Figure S7  | HMBC spectrum of lavaudioside C ( <b>4</b> )                                                  | 8    |
| Figure S8  | <sup>13</sup> C NMR (D <sub>2</sub> O, 75 MHz) of <b>2a</b> + NH <sub>3</sub> after 3 days    | 10   |
| Figure S9  | As Fig. S8 with additional mannitol                                                           | 11   |
| Figure S10 | <sup>13</sup> C NMR (D <sub>2</sub> O, 75 MHz) of <b>5</b> + NH <sub>3</sub> after 3 days     | 12   |
| Figure S11 | <sup>1</sup> H NMR (CD <sub>3</sub> OD, 500 MHz) of 6'-O-caffeoylcatalpol ( <b>7e</b> )       | 13   |
| Figure S12 | <sup>13</sup> C NMR (CD <sub>3</sub> OD, 125 MHz) of 6'-O-caffeoylcatalpol ( <b>7e</b> )      | 14   |
| Figure S13 | <sup>1</sup> H NMR (CD <sub>3</sub> OD, 500 MHz) of 6,6'-di-O-caffeoylcatalpol ( <b>7f</b> )  | 15   |
| Figure S14 | <sup>13</sup> C NMR (CD <sub>3</sub> OD, 125 MHz) of 6,6'-di-O-caffeoylcatalpol ( <b>7f</b> ) | 16   |
| Figure S15 | <sup>1</sup> H NMR (CD <sub>3</sub> OD, 500 MHz) of helioside A ( <b>8b</b> )                 | 17   |
| Figure S16 | <sup>13</sup> C NMR (CD <sub>3</sub> OD, 125 MHz) of helioside A ( <b>8b</b> )                | 18   |
| Figure S17 | <sup>1</sup> H NMR (CD <sub>3</sub> OD, 500 MHz) of helioside B ( <b>8c</b> )                 | 19   |
| Figure S18 | <sup>13</sup> C NMR (CD <sub>3</sub> OD, 125 MHz) of helioside B ( <b>8c</b> )                | 20   |
| Figure S19 | <sup>1</sup> H NMR (CD <sub>3</sub> OD, 500 MHz) of helioside C ( <b>8d</b> )                 | 21   |
| Figure S20 | <sup>13</sup> C NMR (CD <sub>3</sub> OD, 125 MHz) of helioside C ( <b>8d</b> )                | 22   |
|            | Optical rotations for 1-β-D-glucopyranosyl mannitol and its esters.                           | 23   |

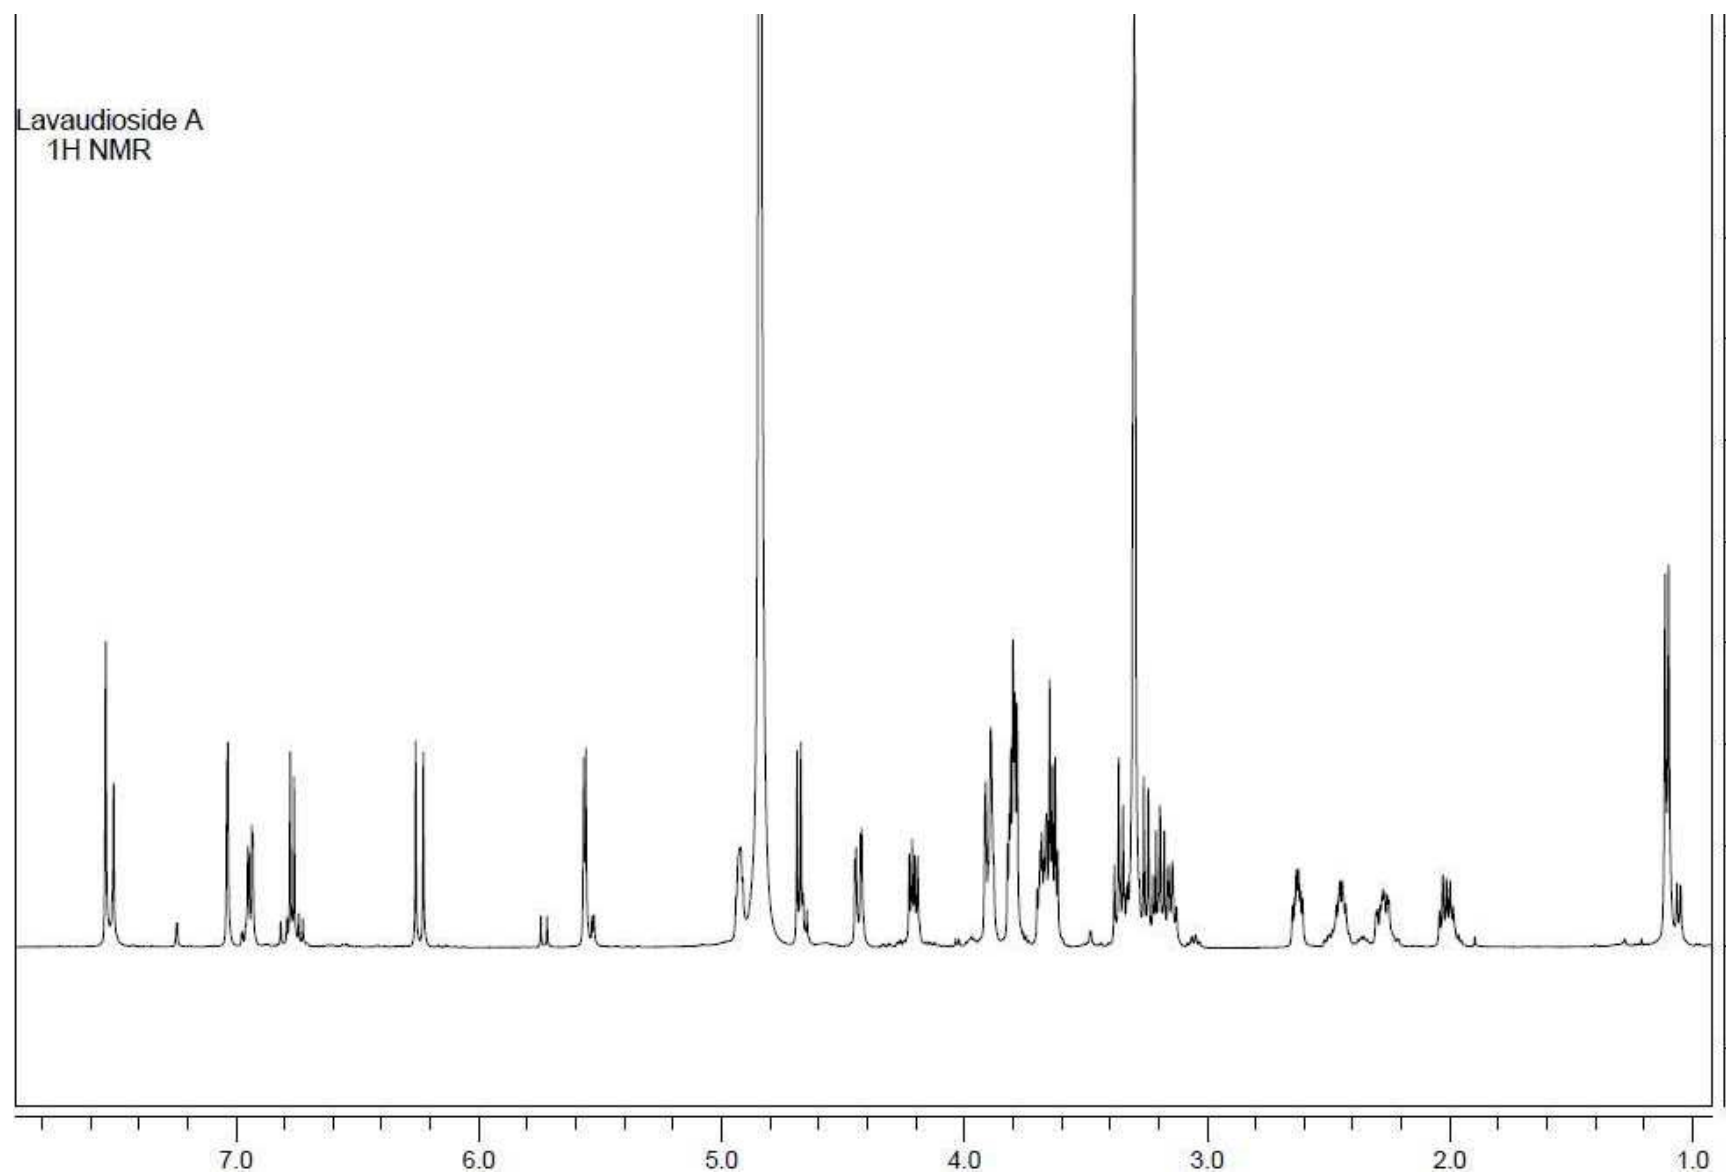

Figure S1.

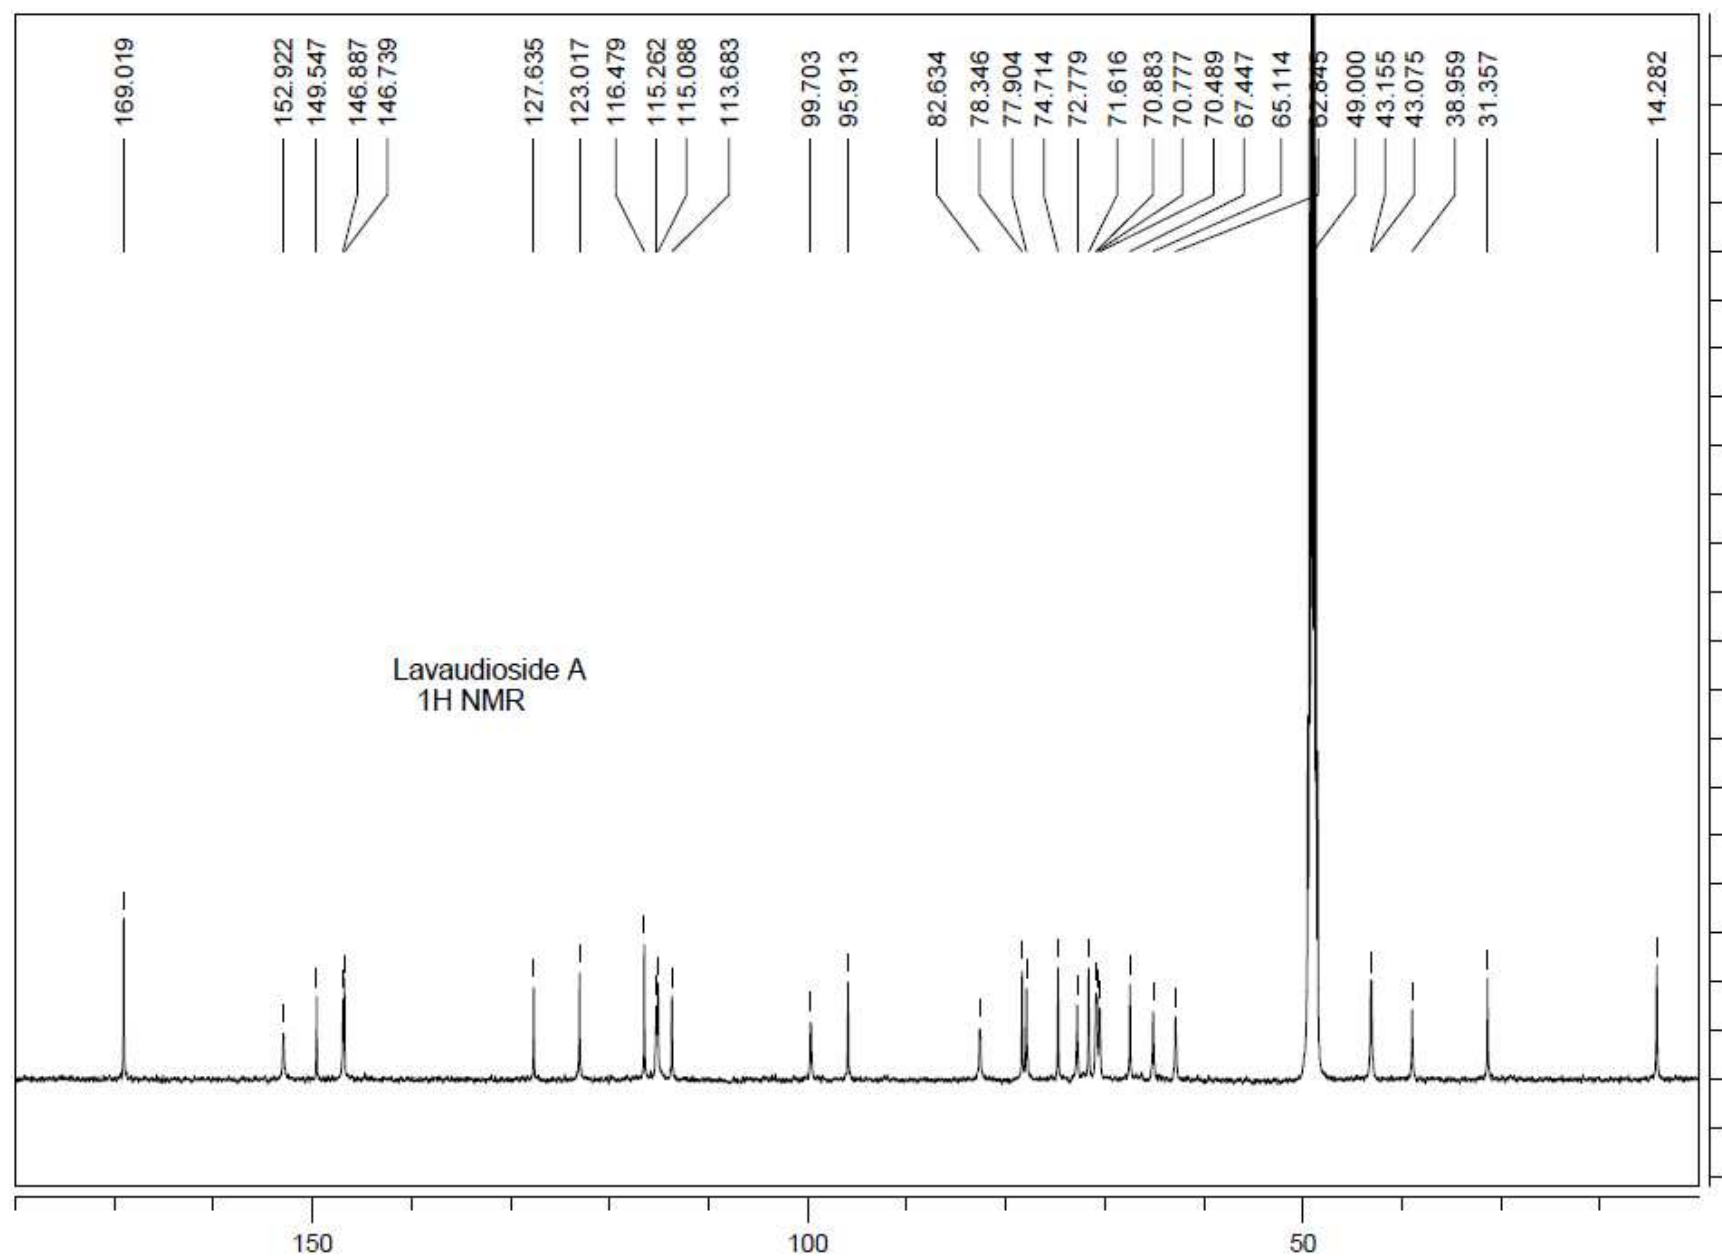

Figure S2.



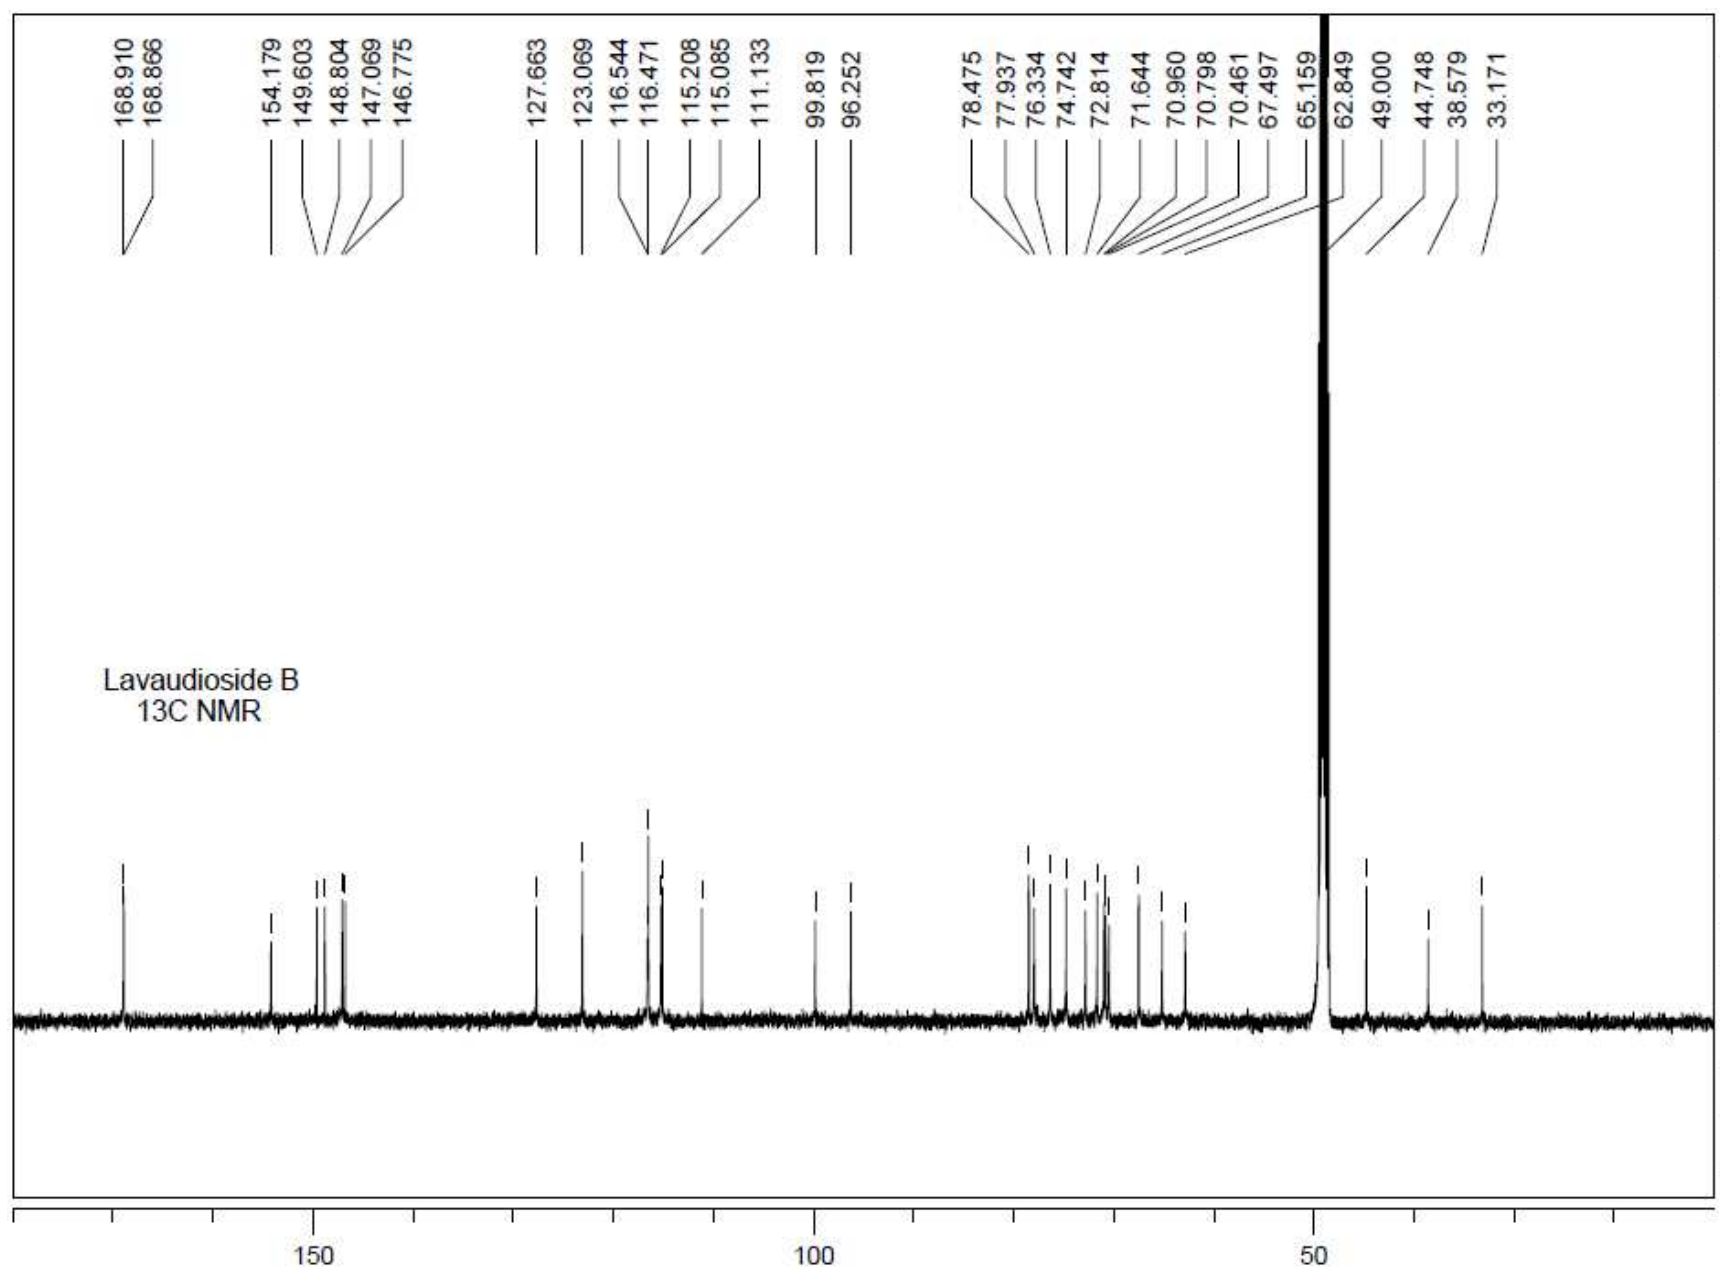

Figure S4.

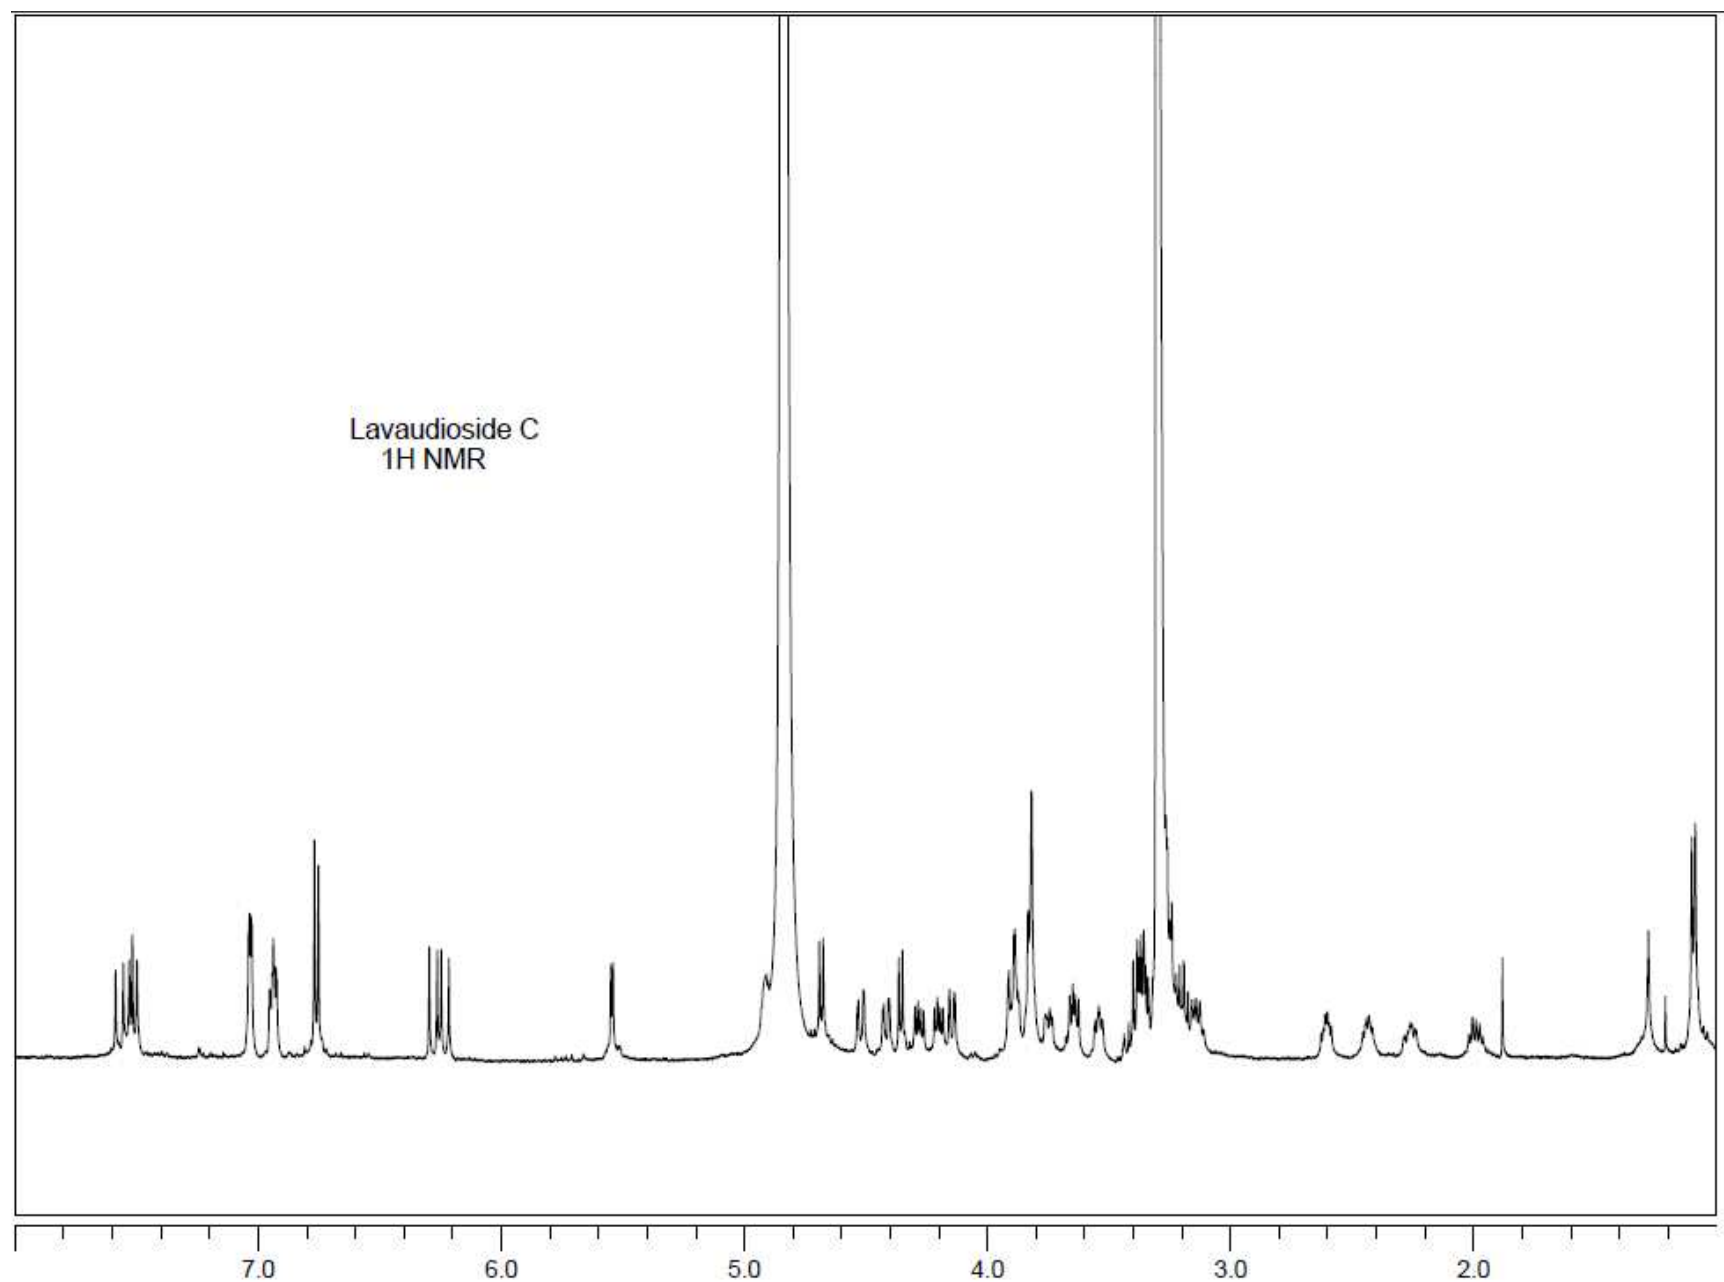

Figure S5.

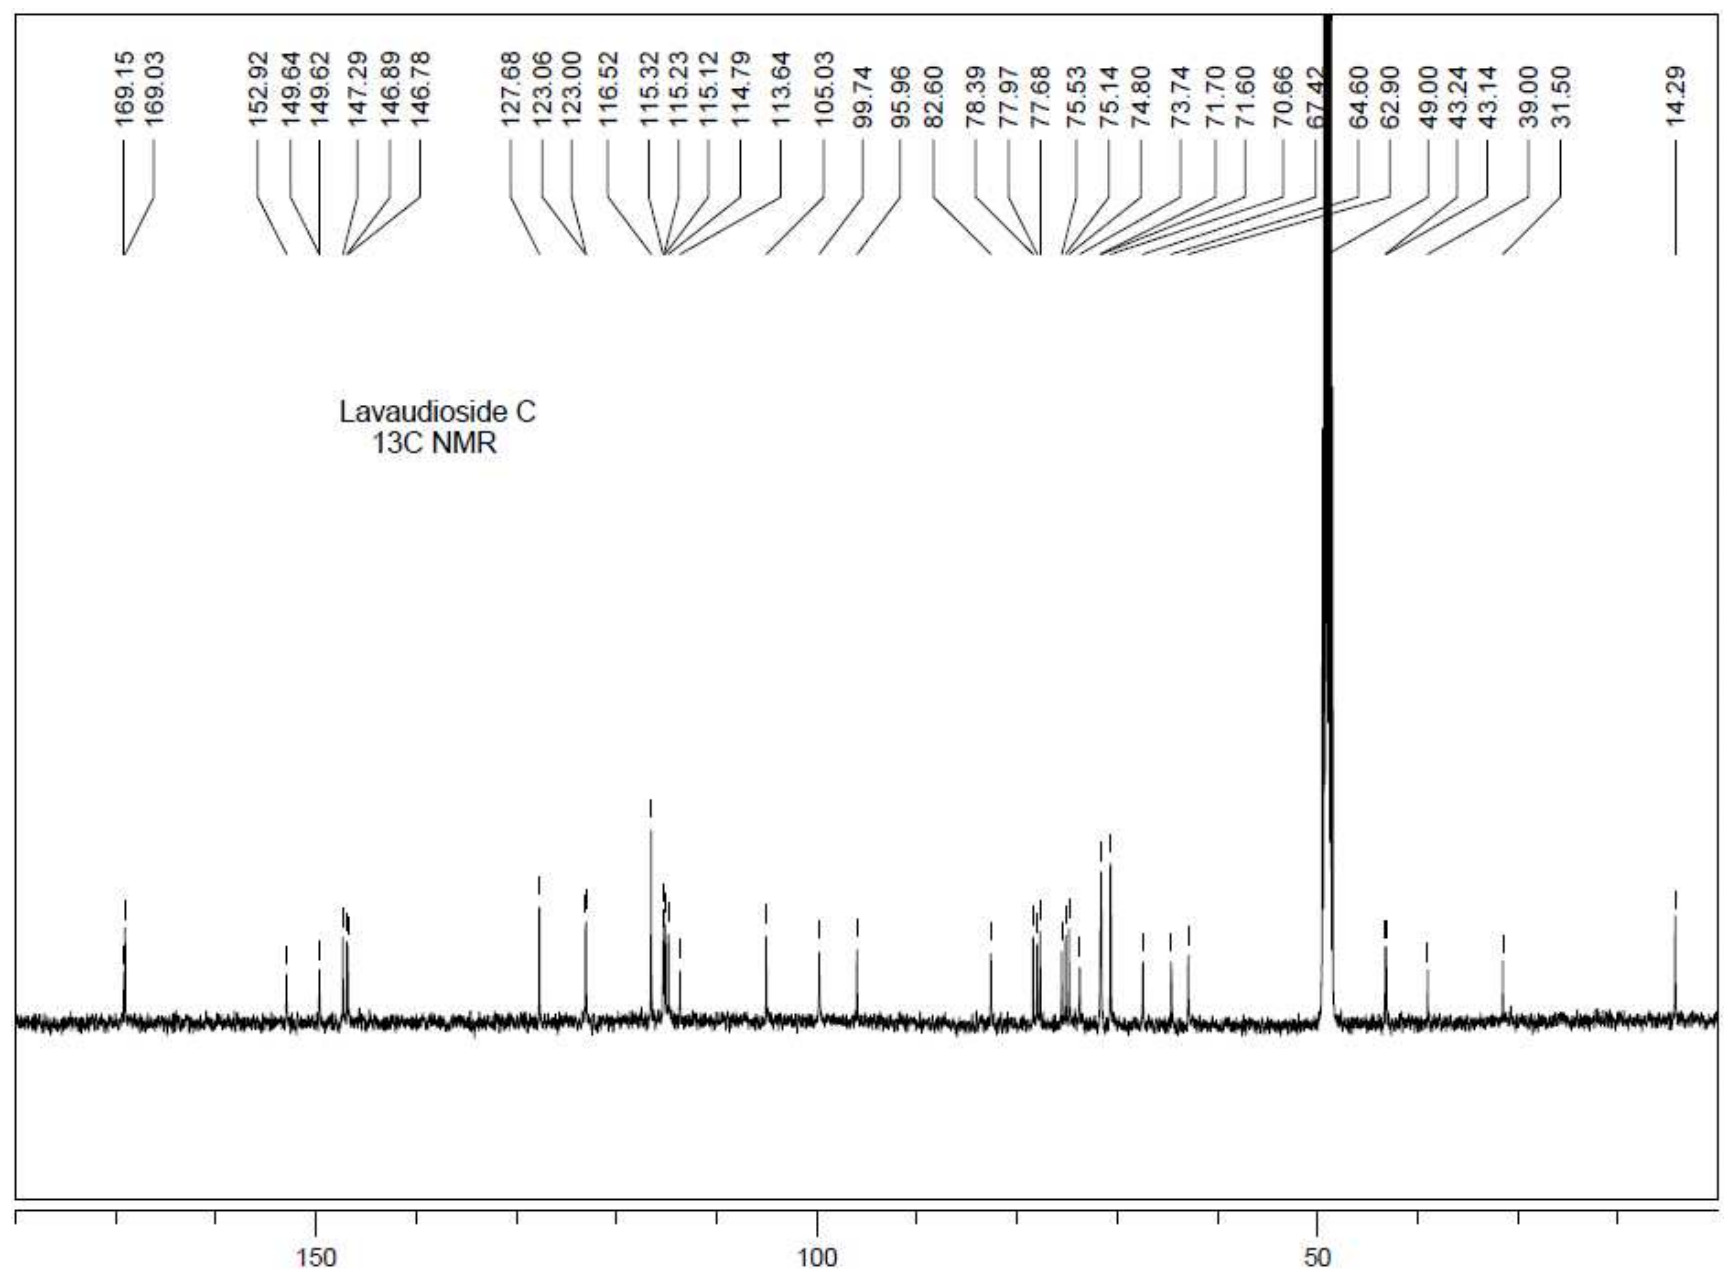

Figure S6.



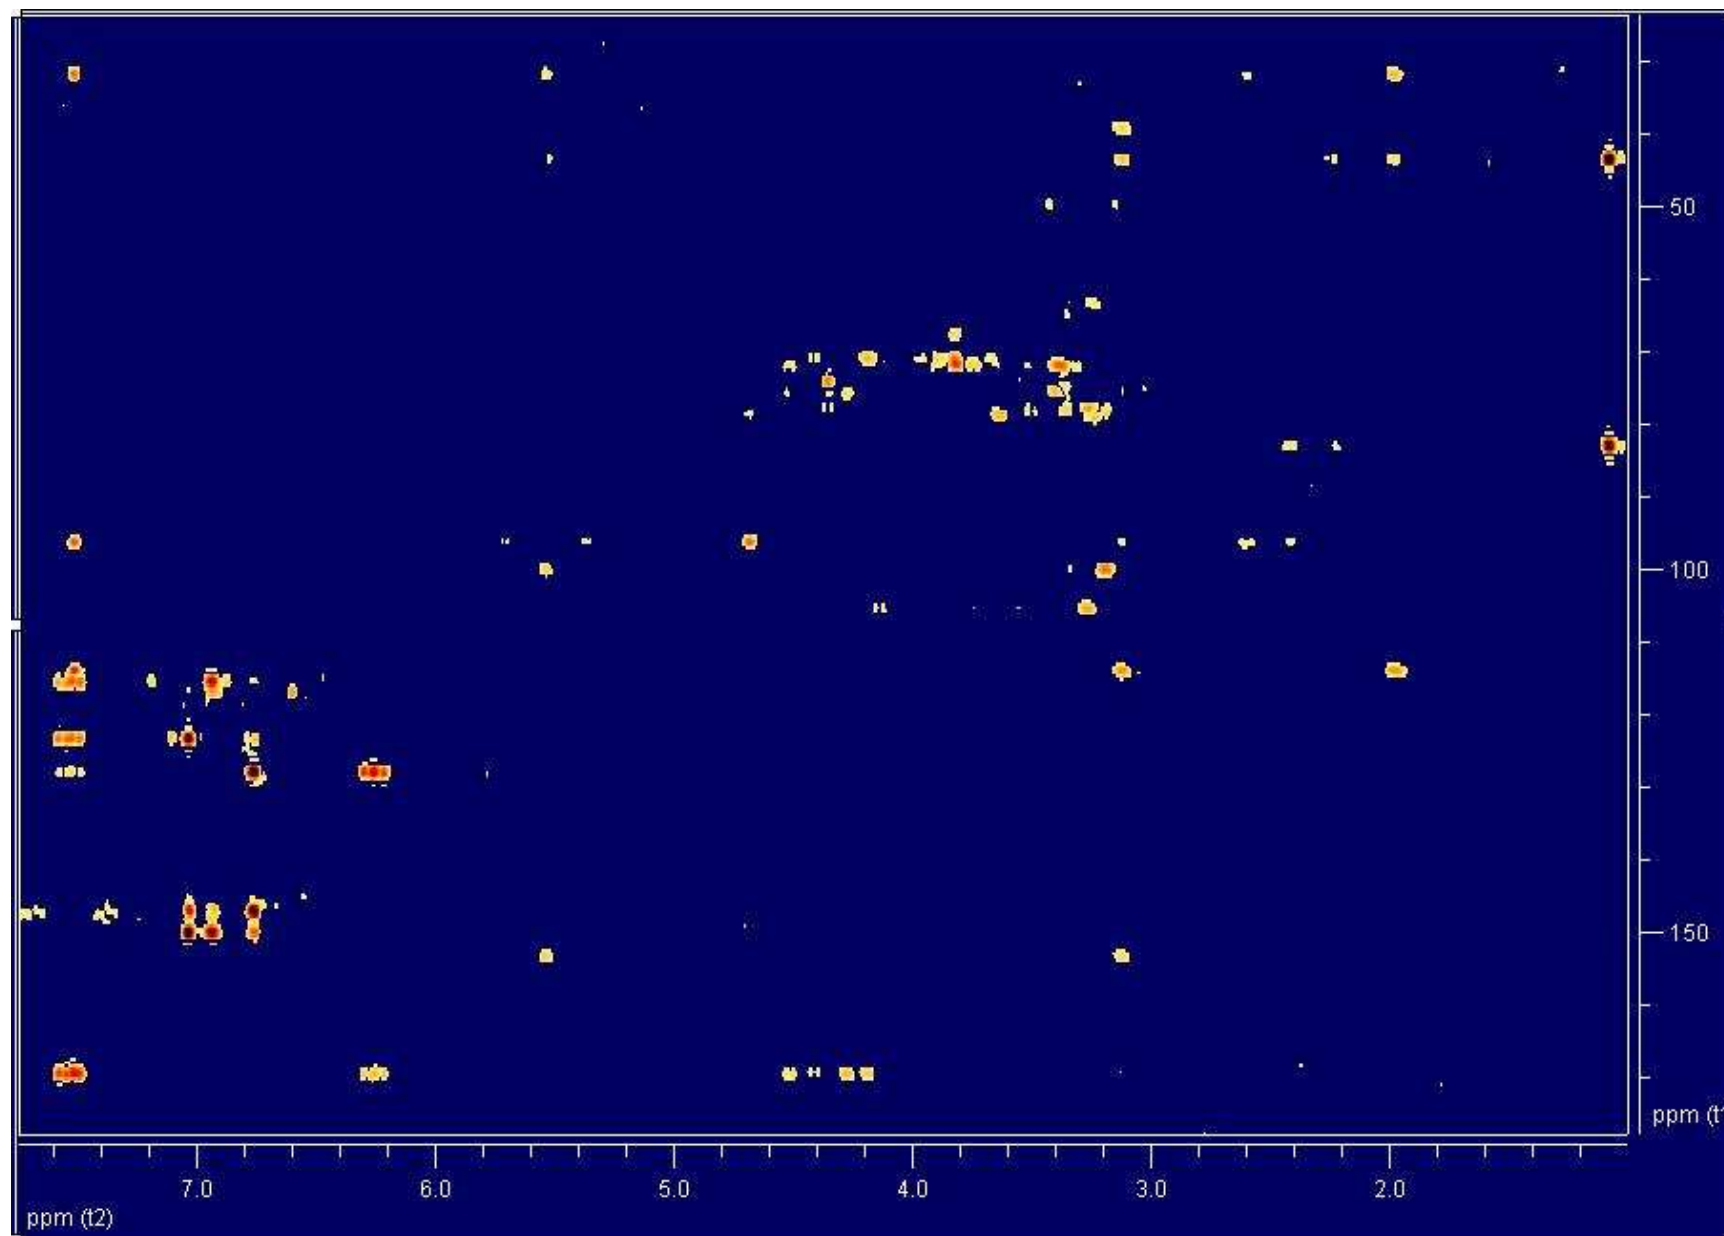

Figure S7. HMBC spectrum of lavaudioside C.

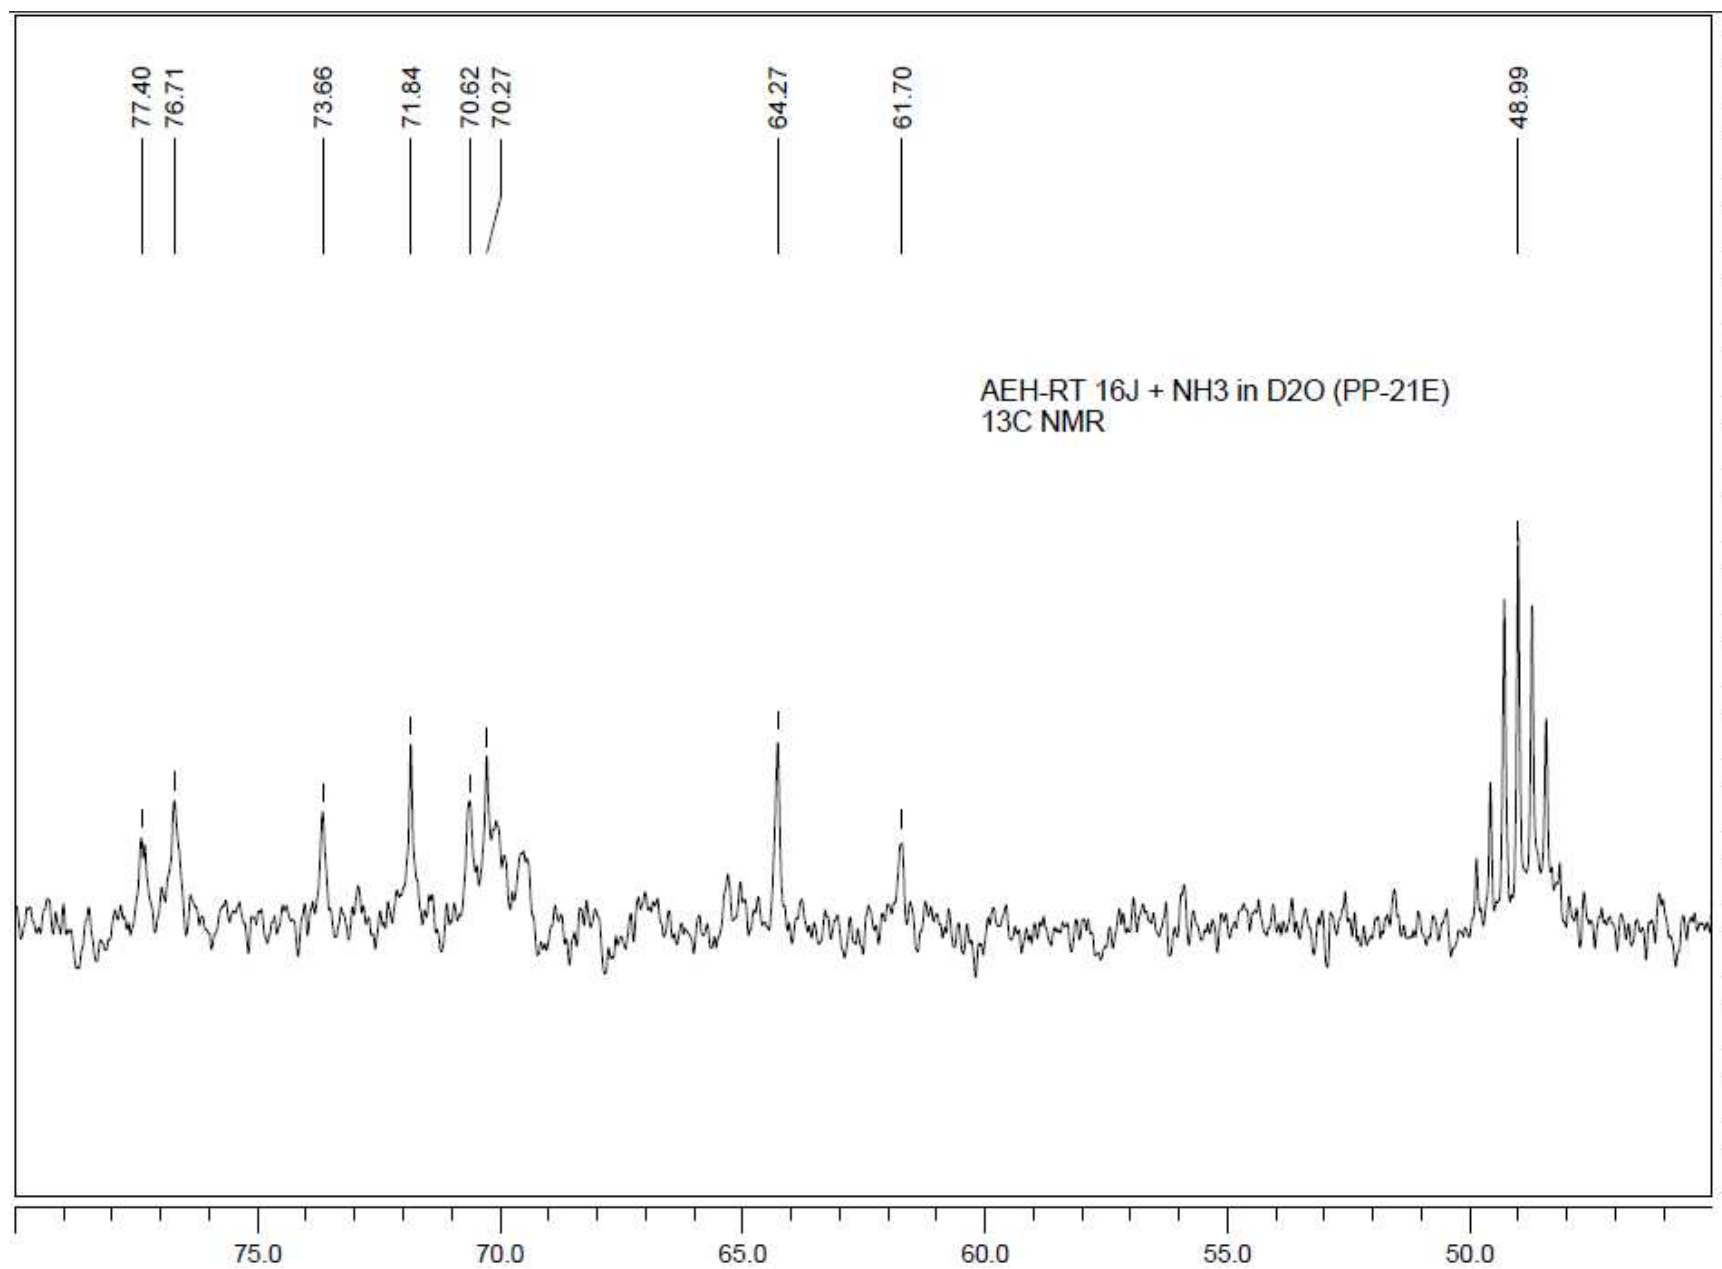

Figure S8. Peaks at 64.3, 70.3, and 71.8 derive from free mannitol (see also Fig. S9).

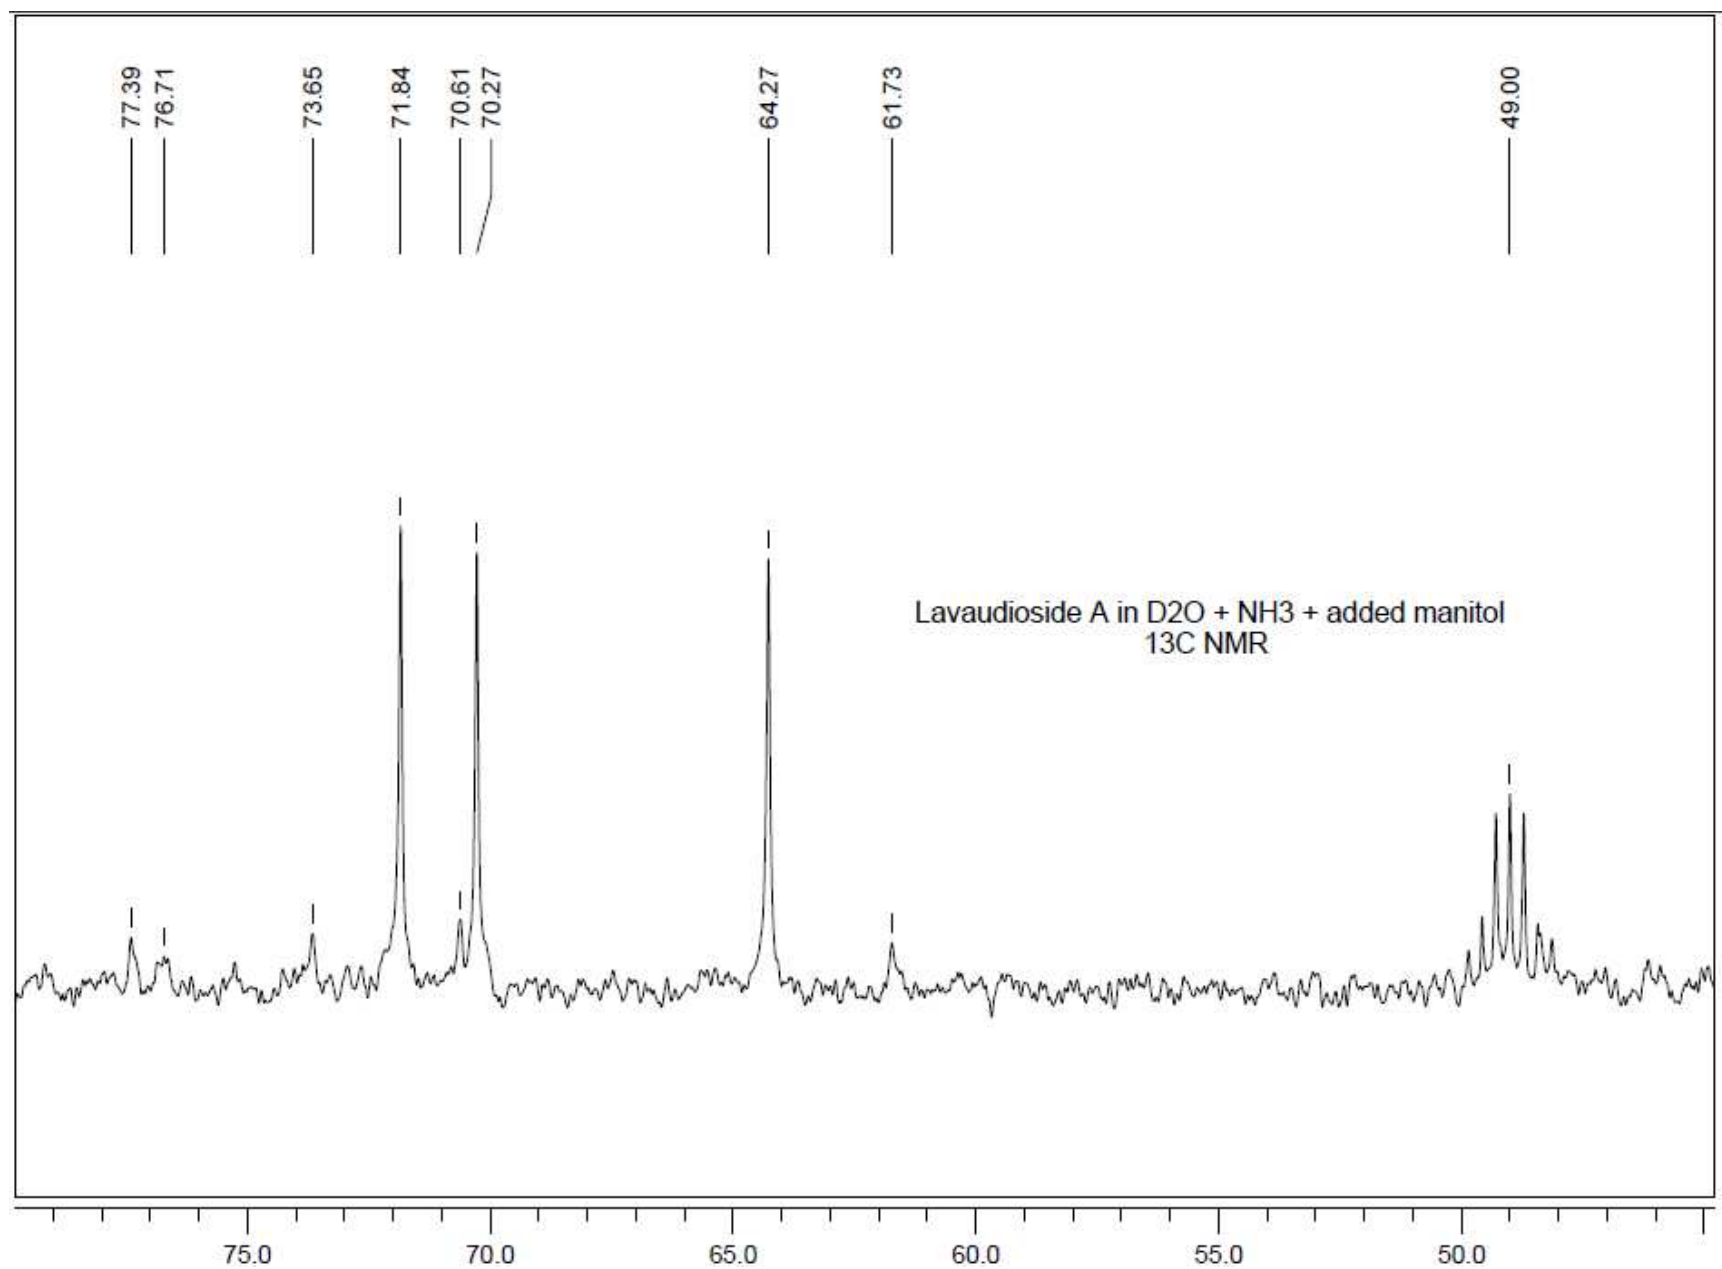

Figure S9.

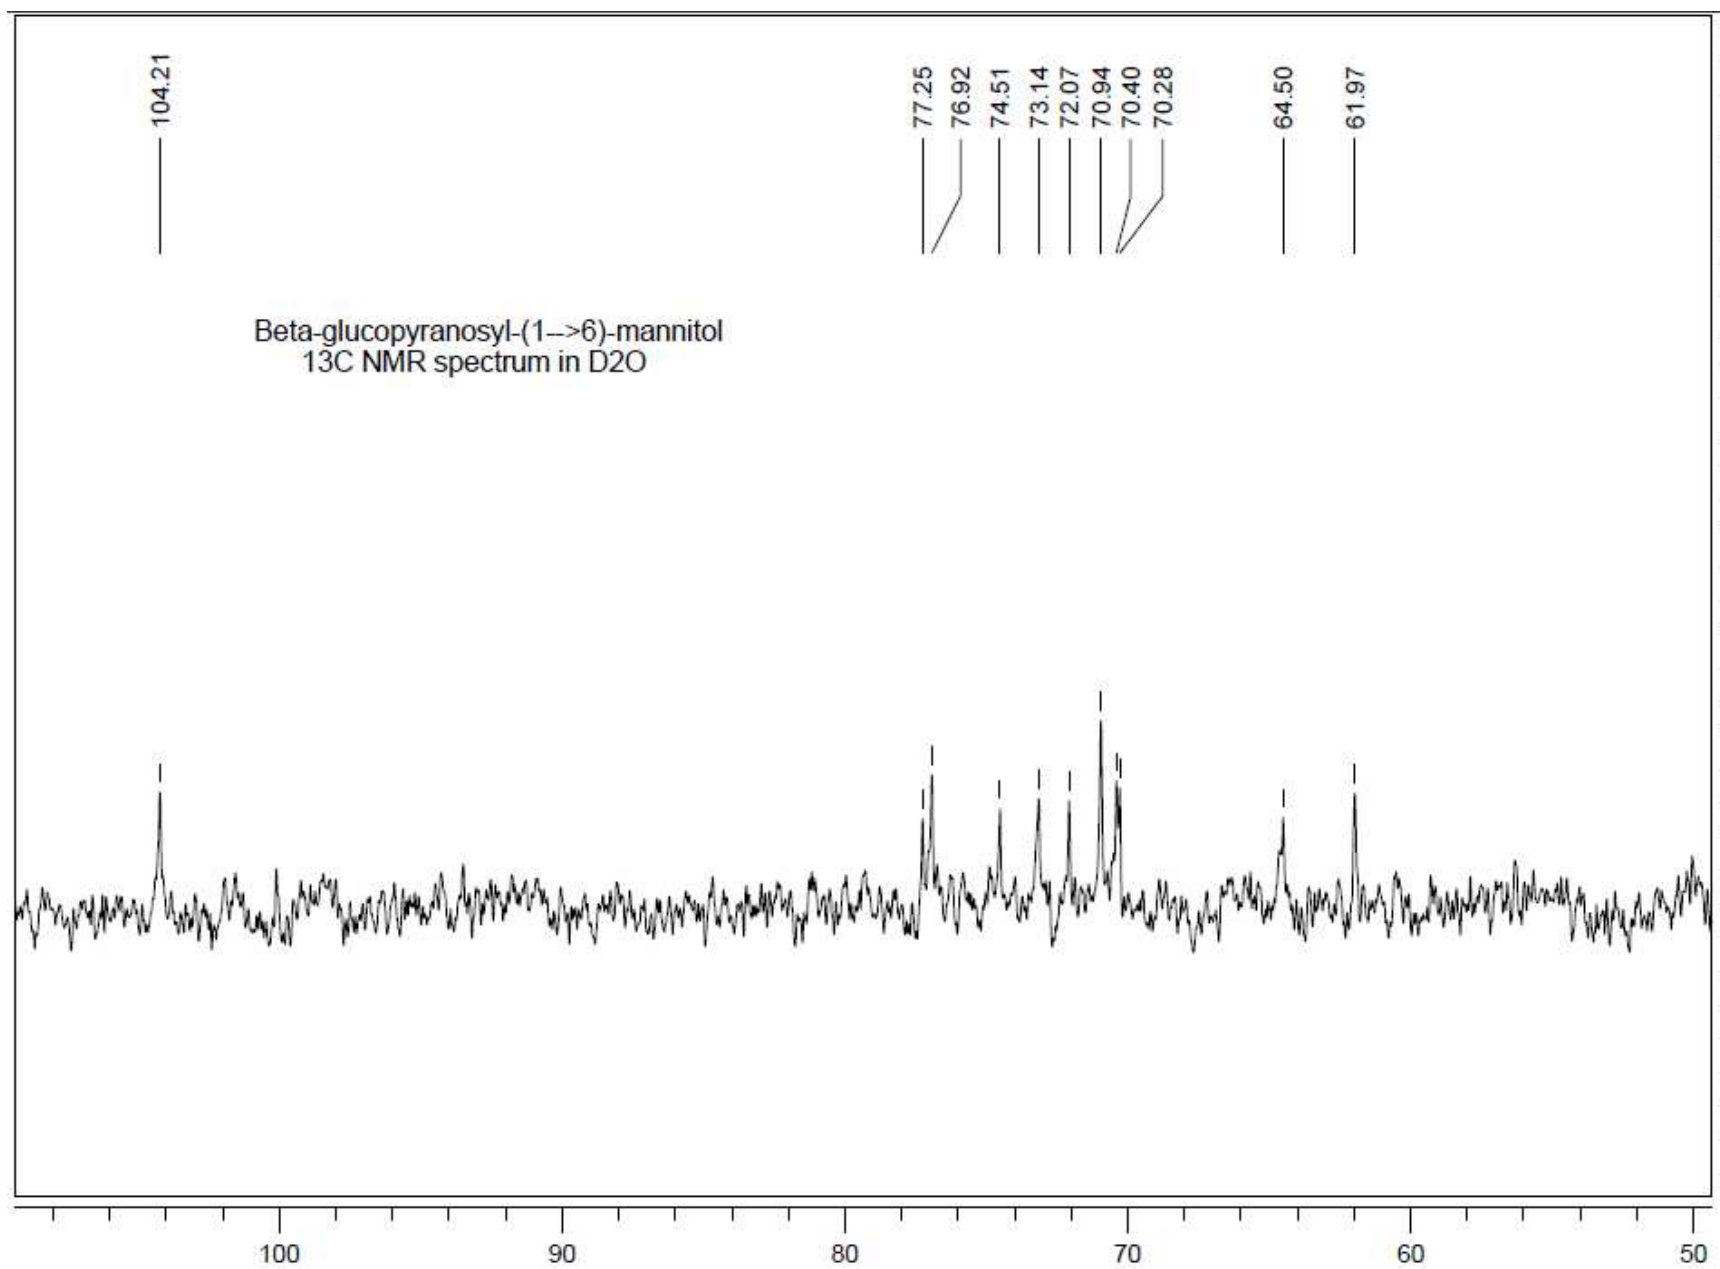

Figure S10.

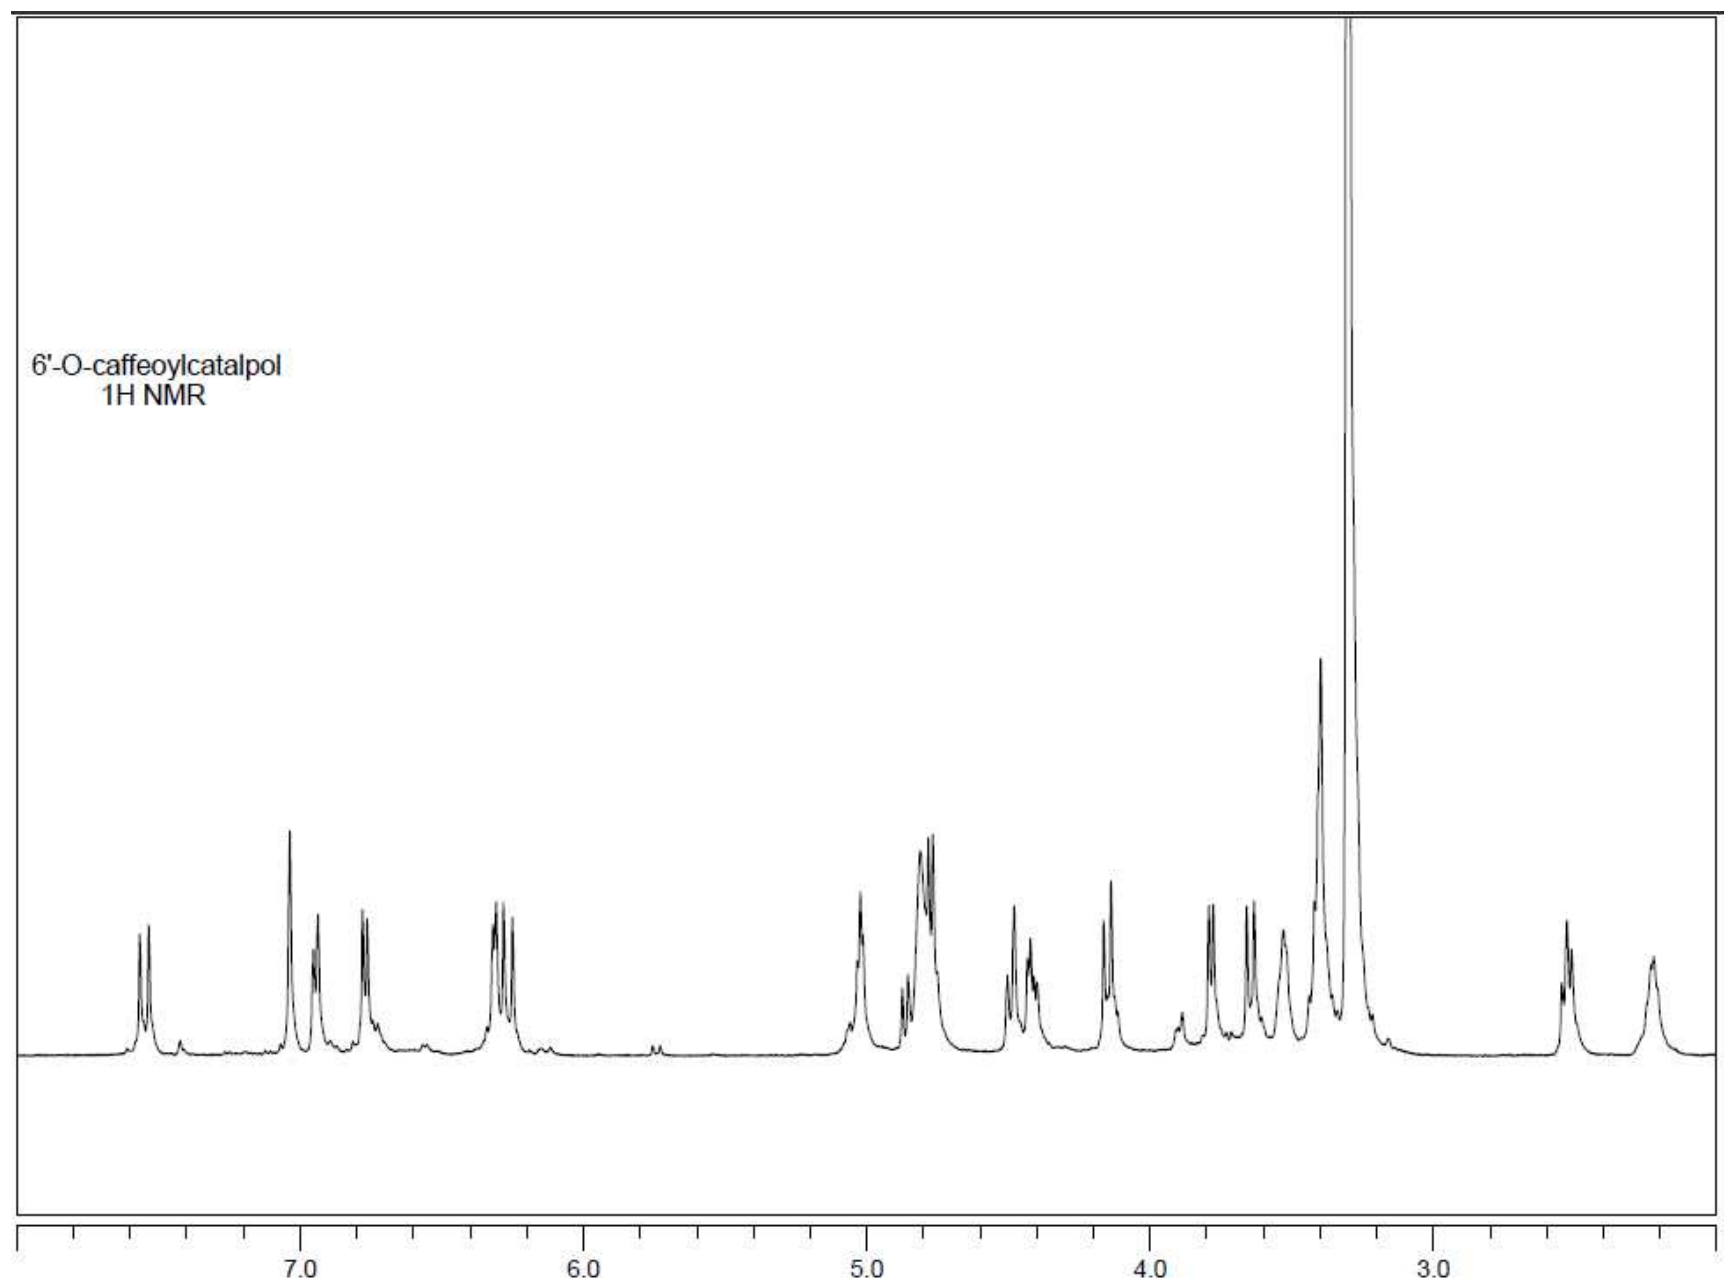

Figure S11.

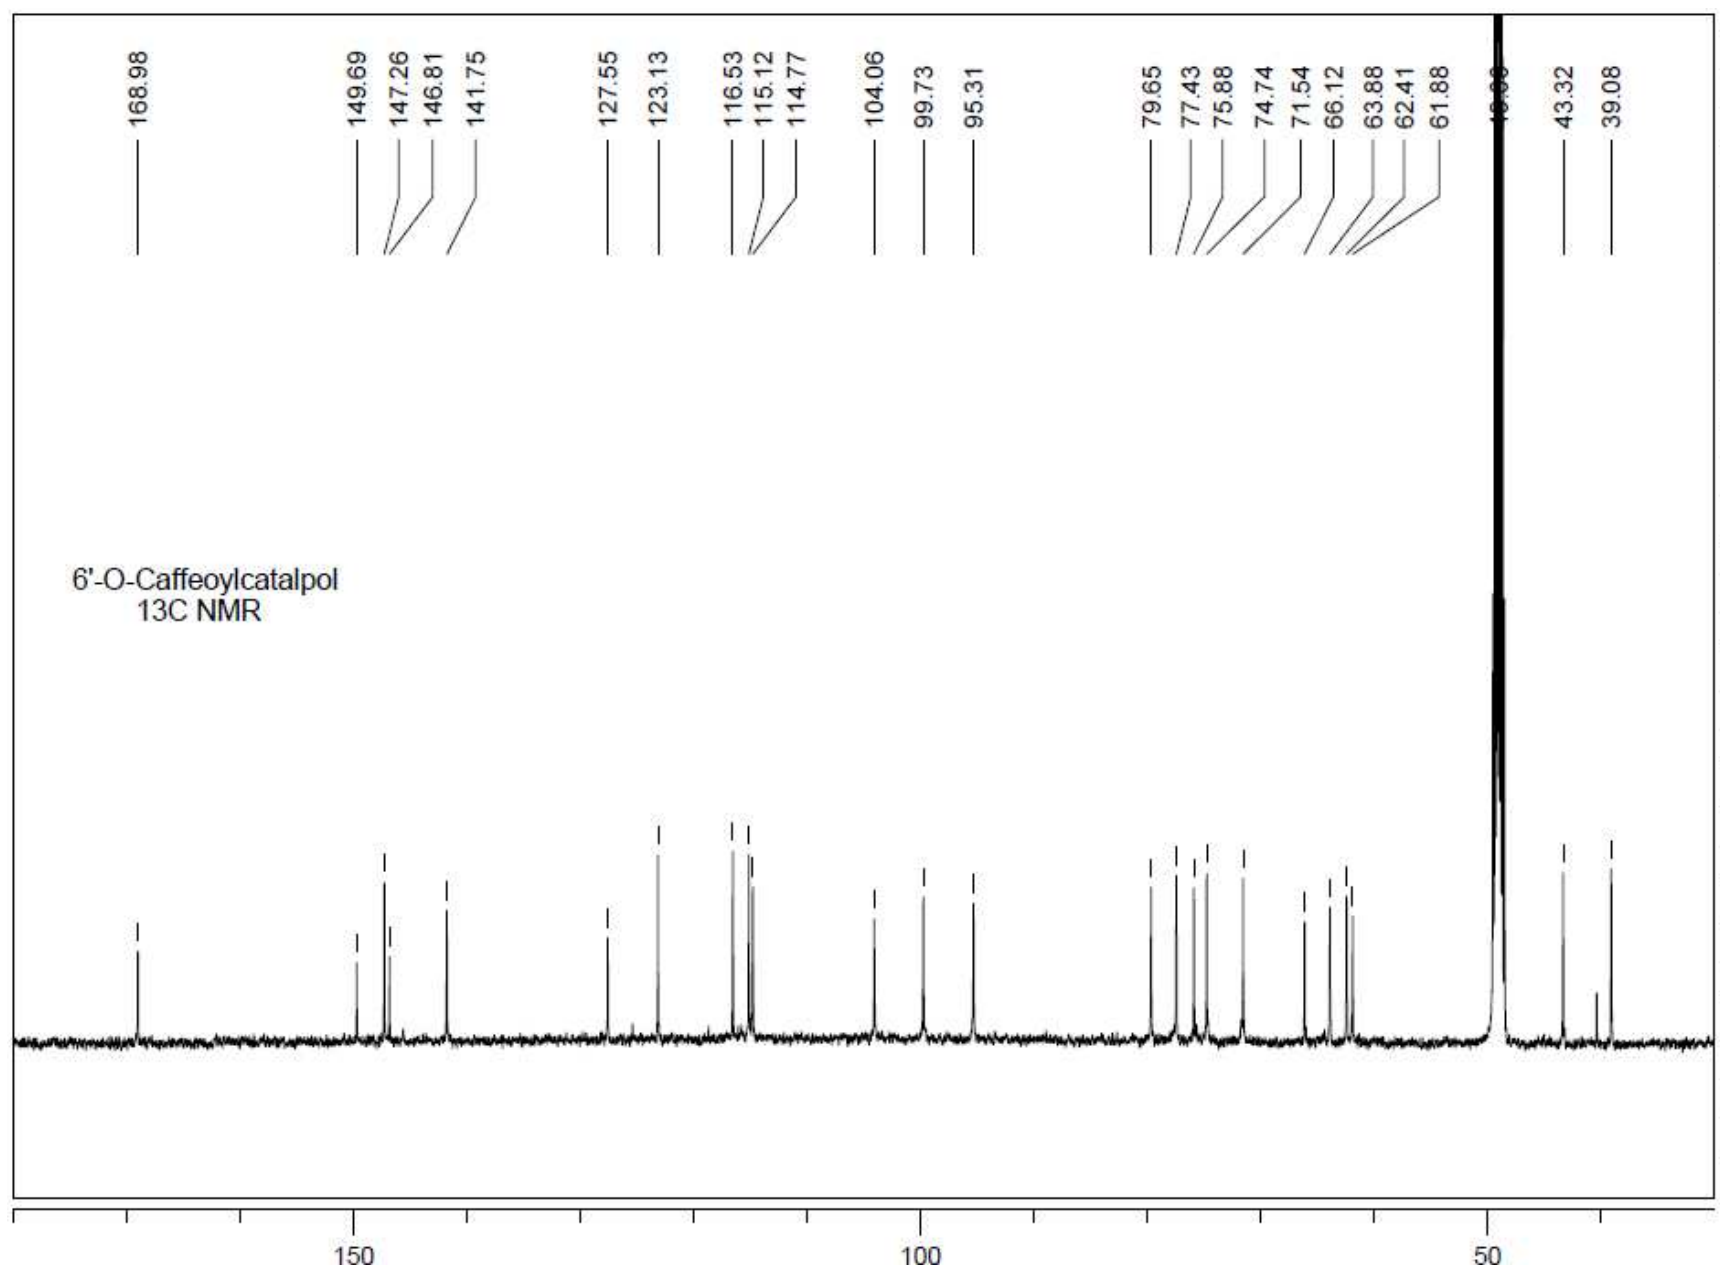

Figure S12.

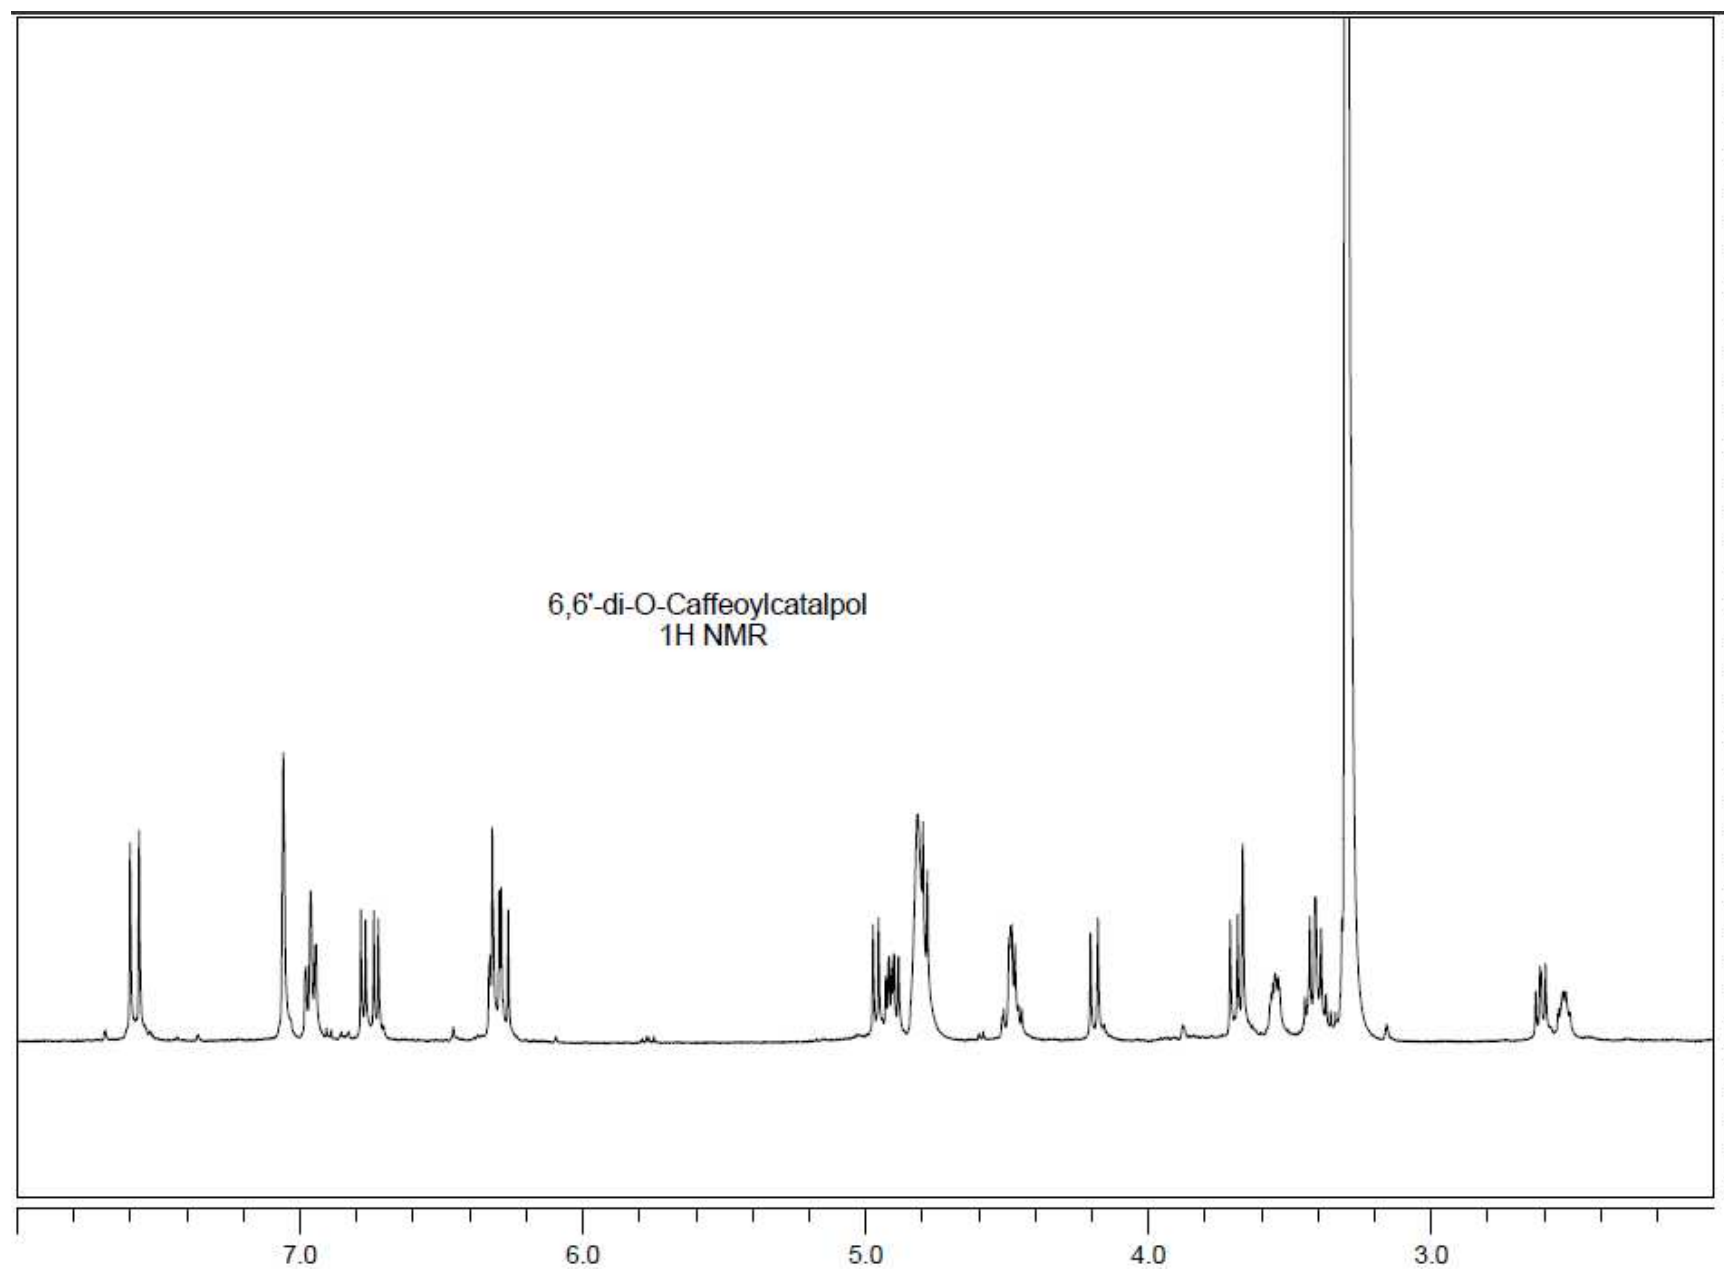

Figure S13.

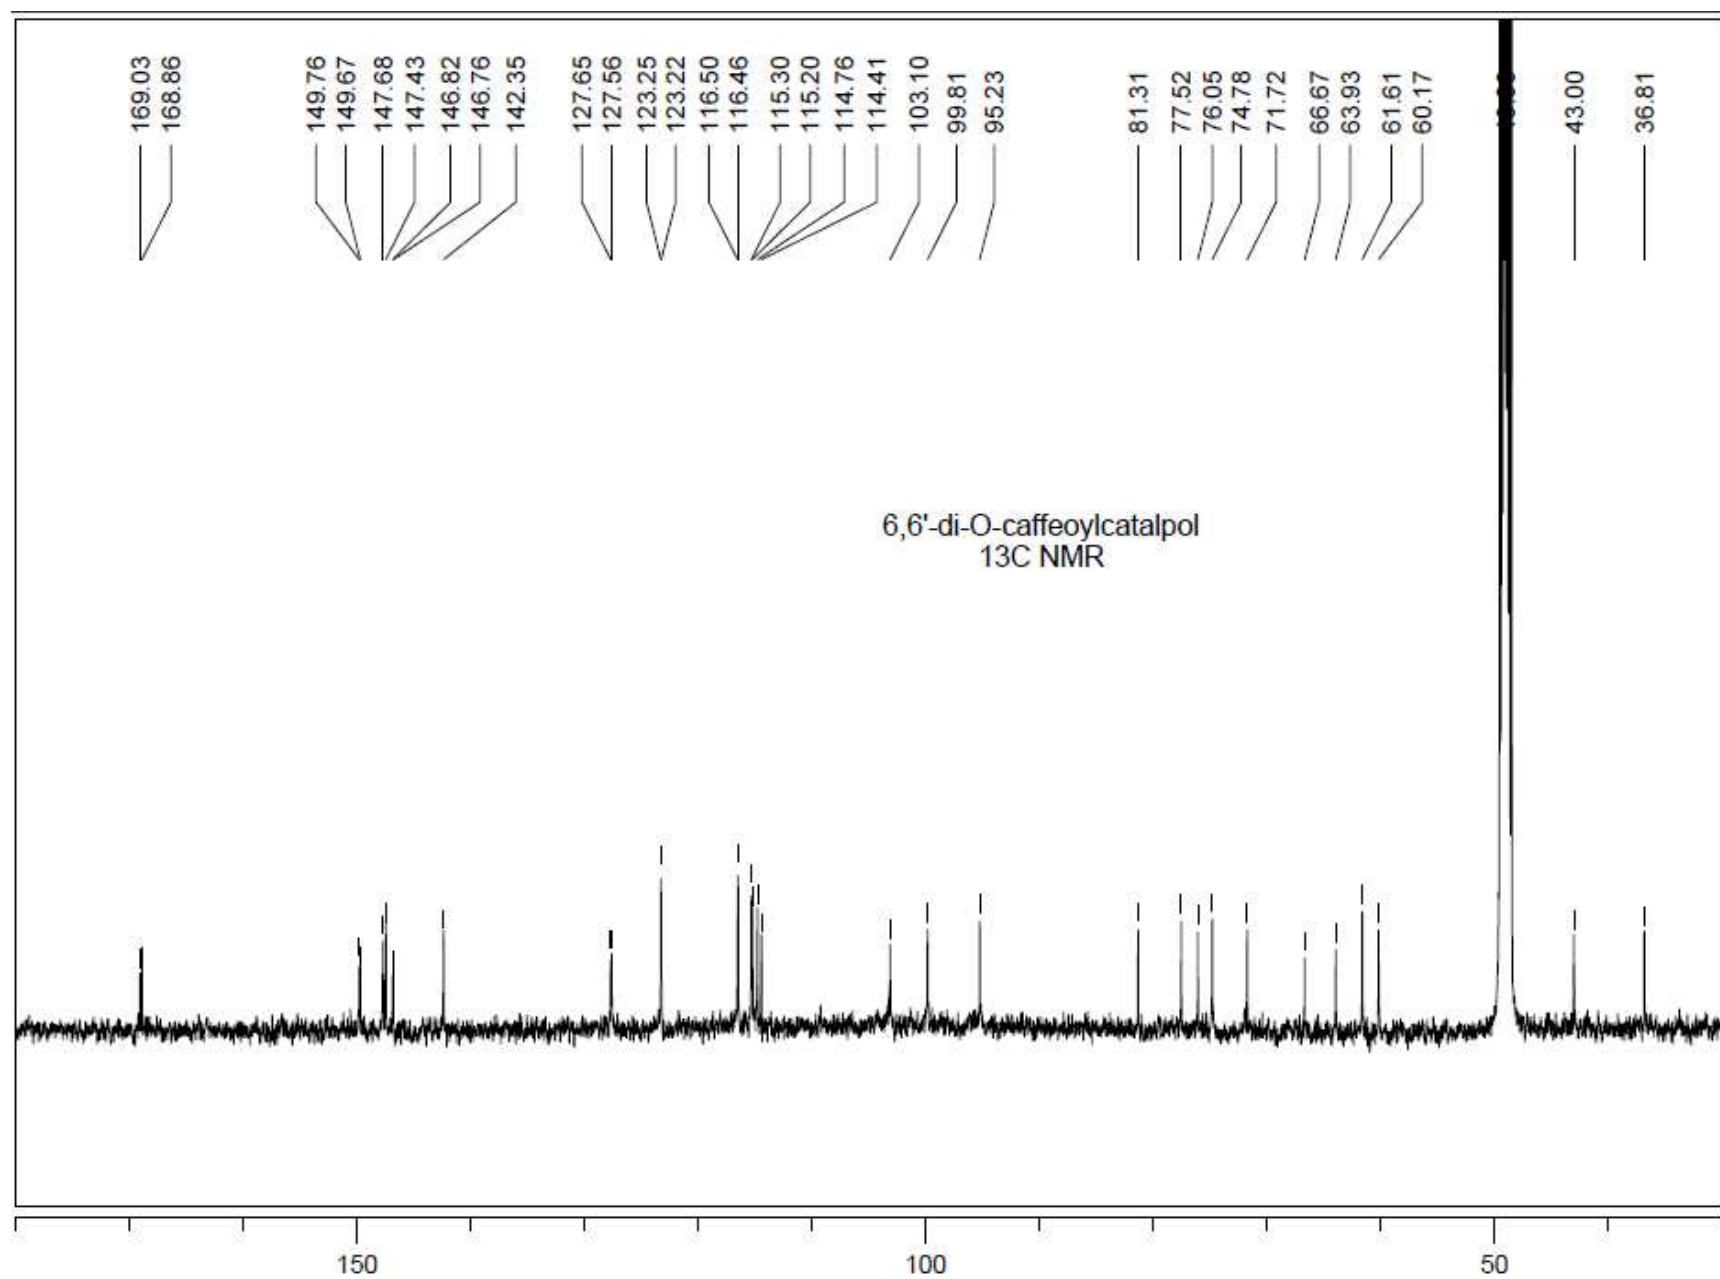

Figure S14.



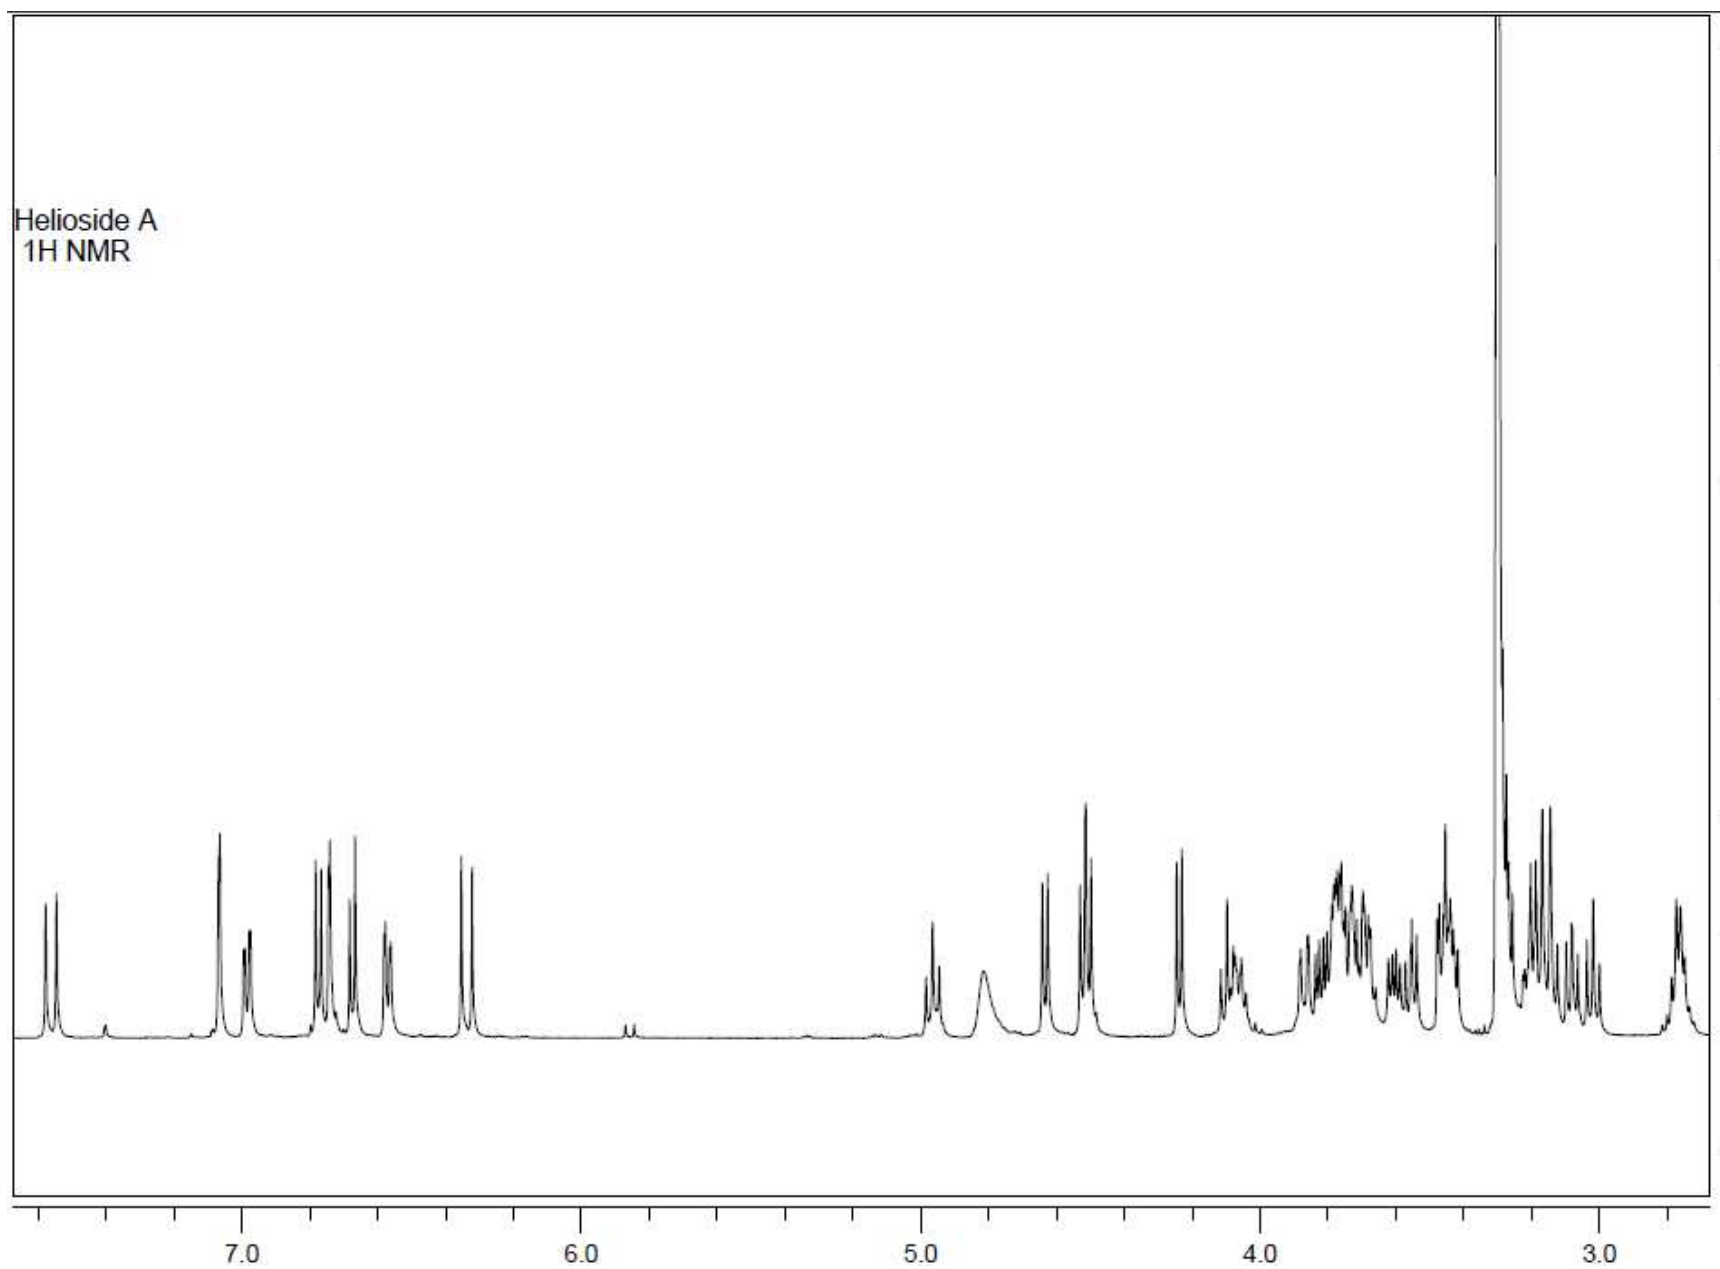

Figure S15.

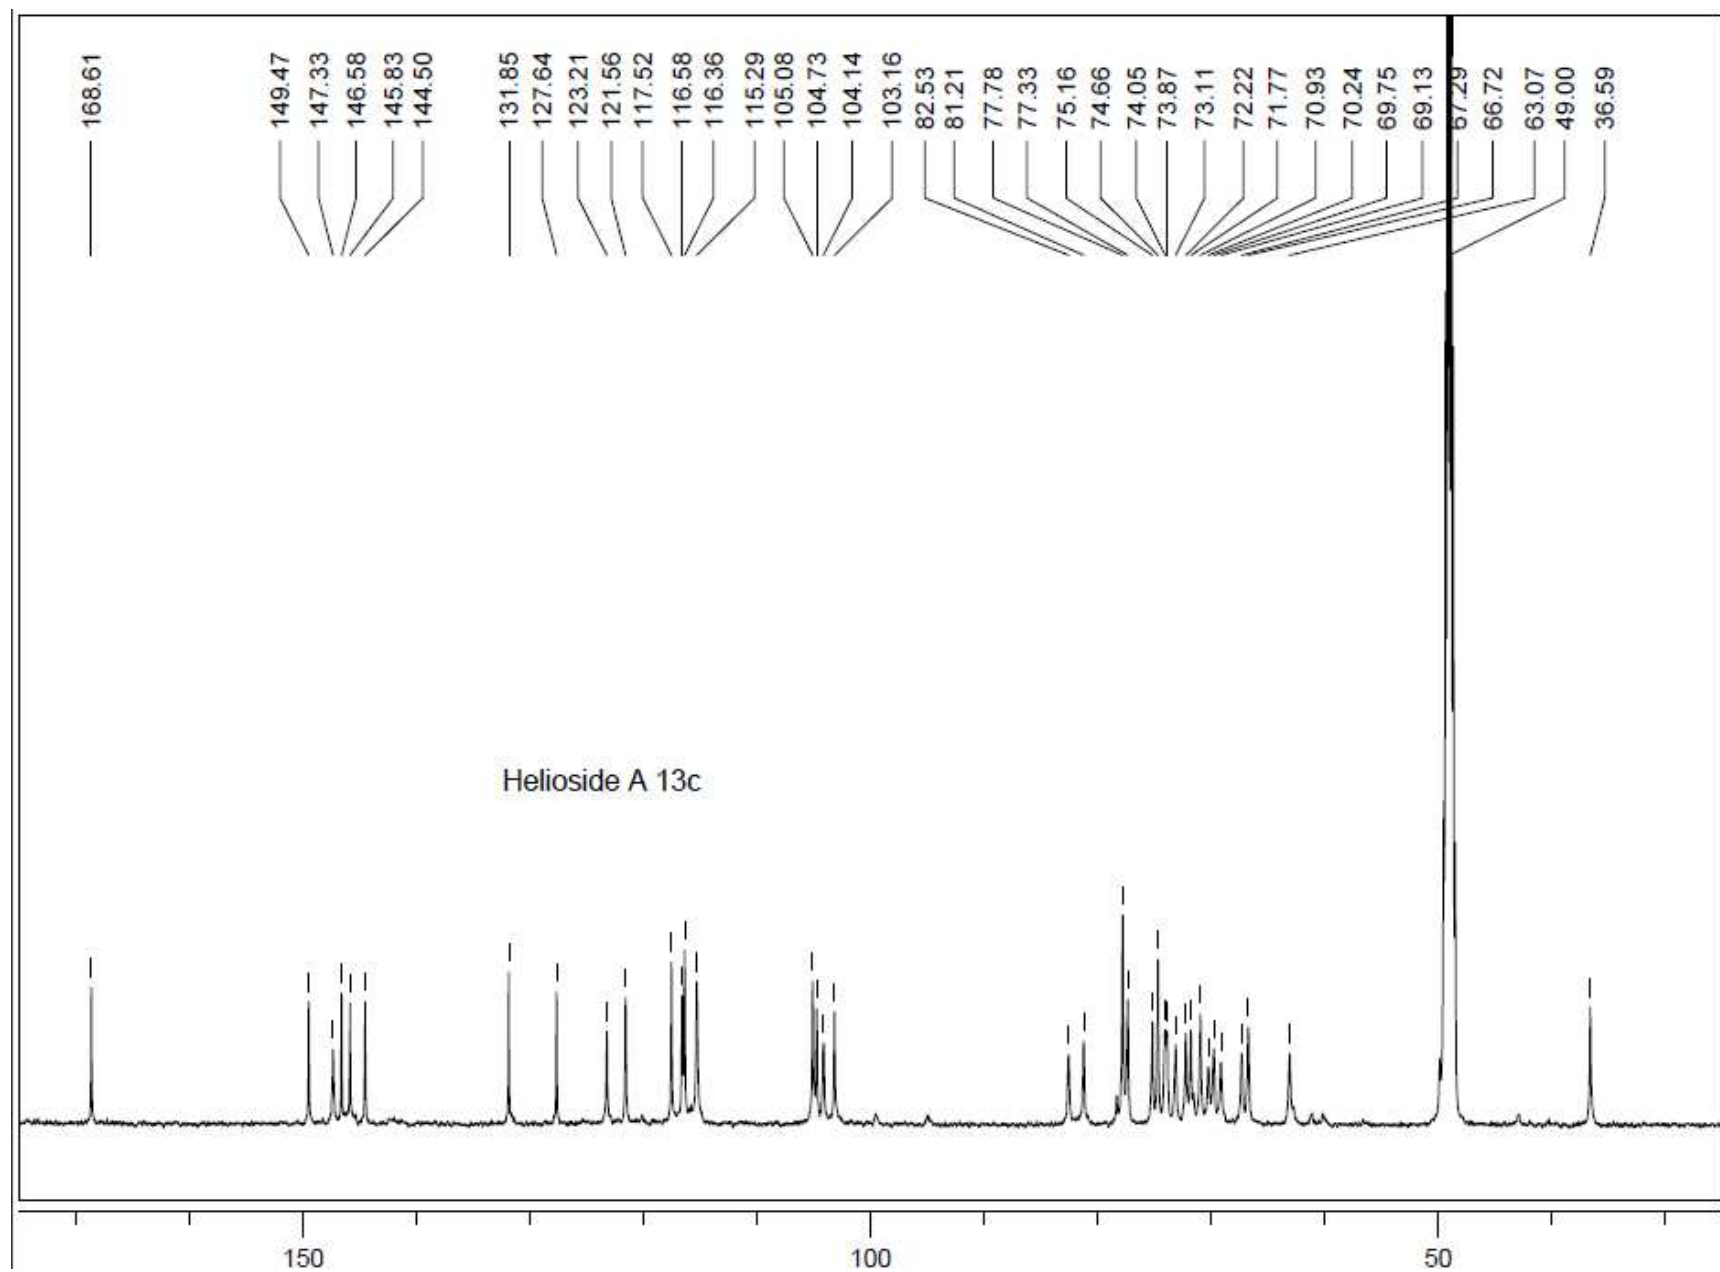

Figure S16.

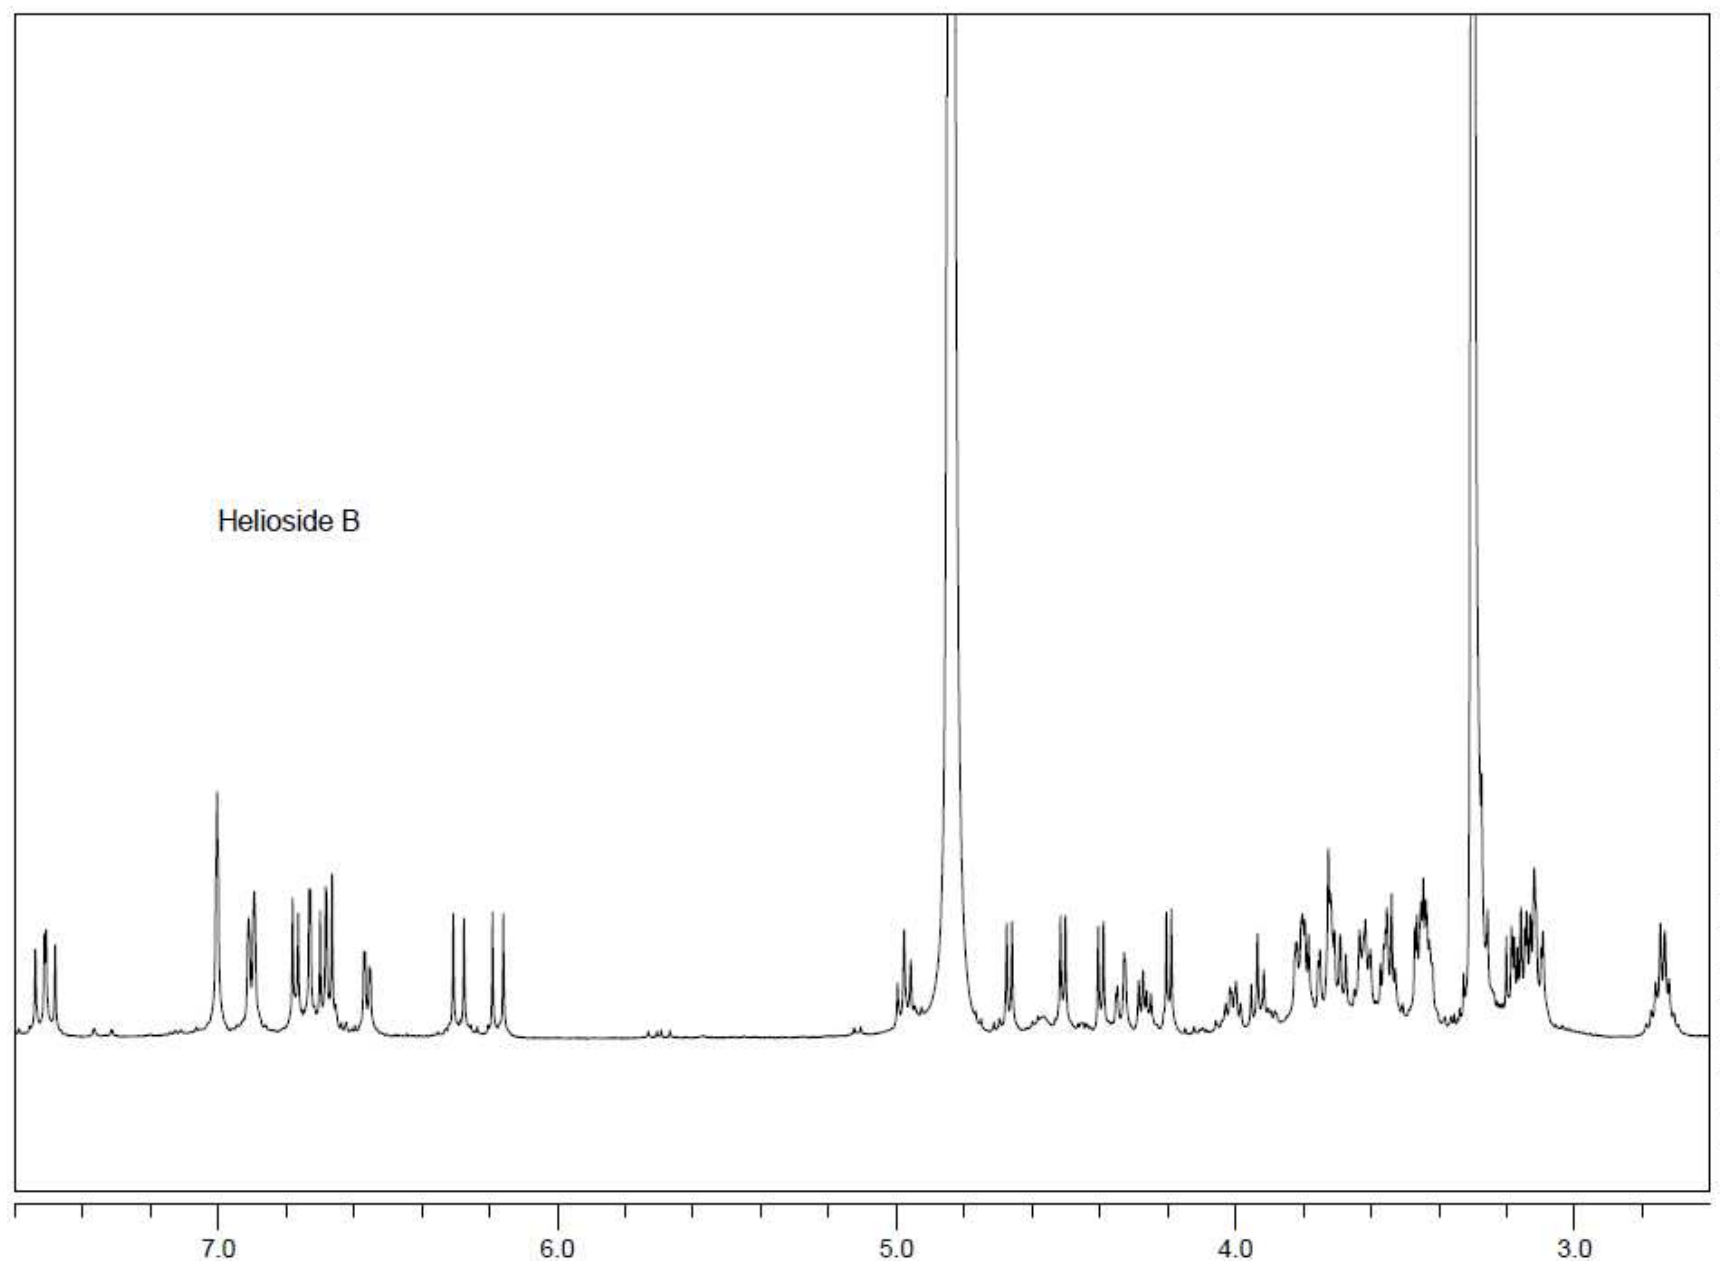

Figure S17.

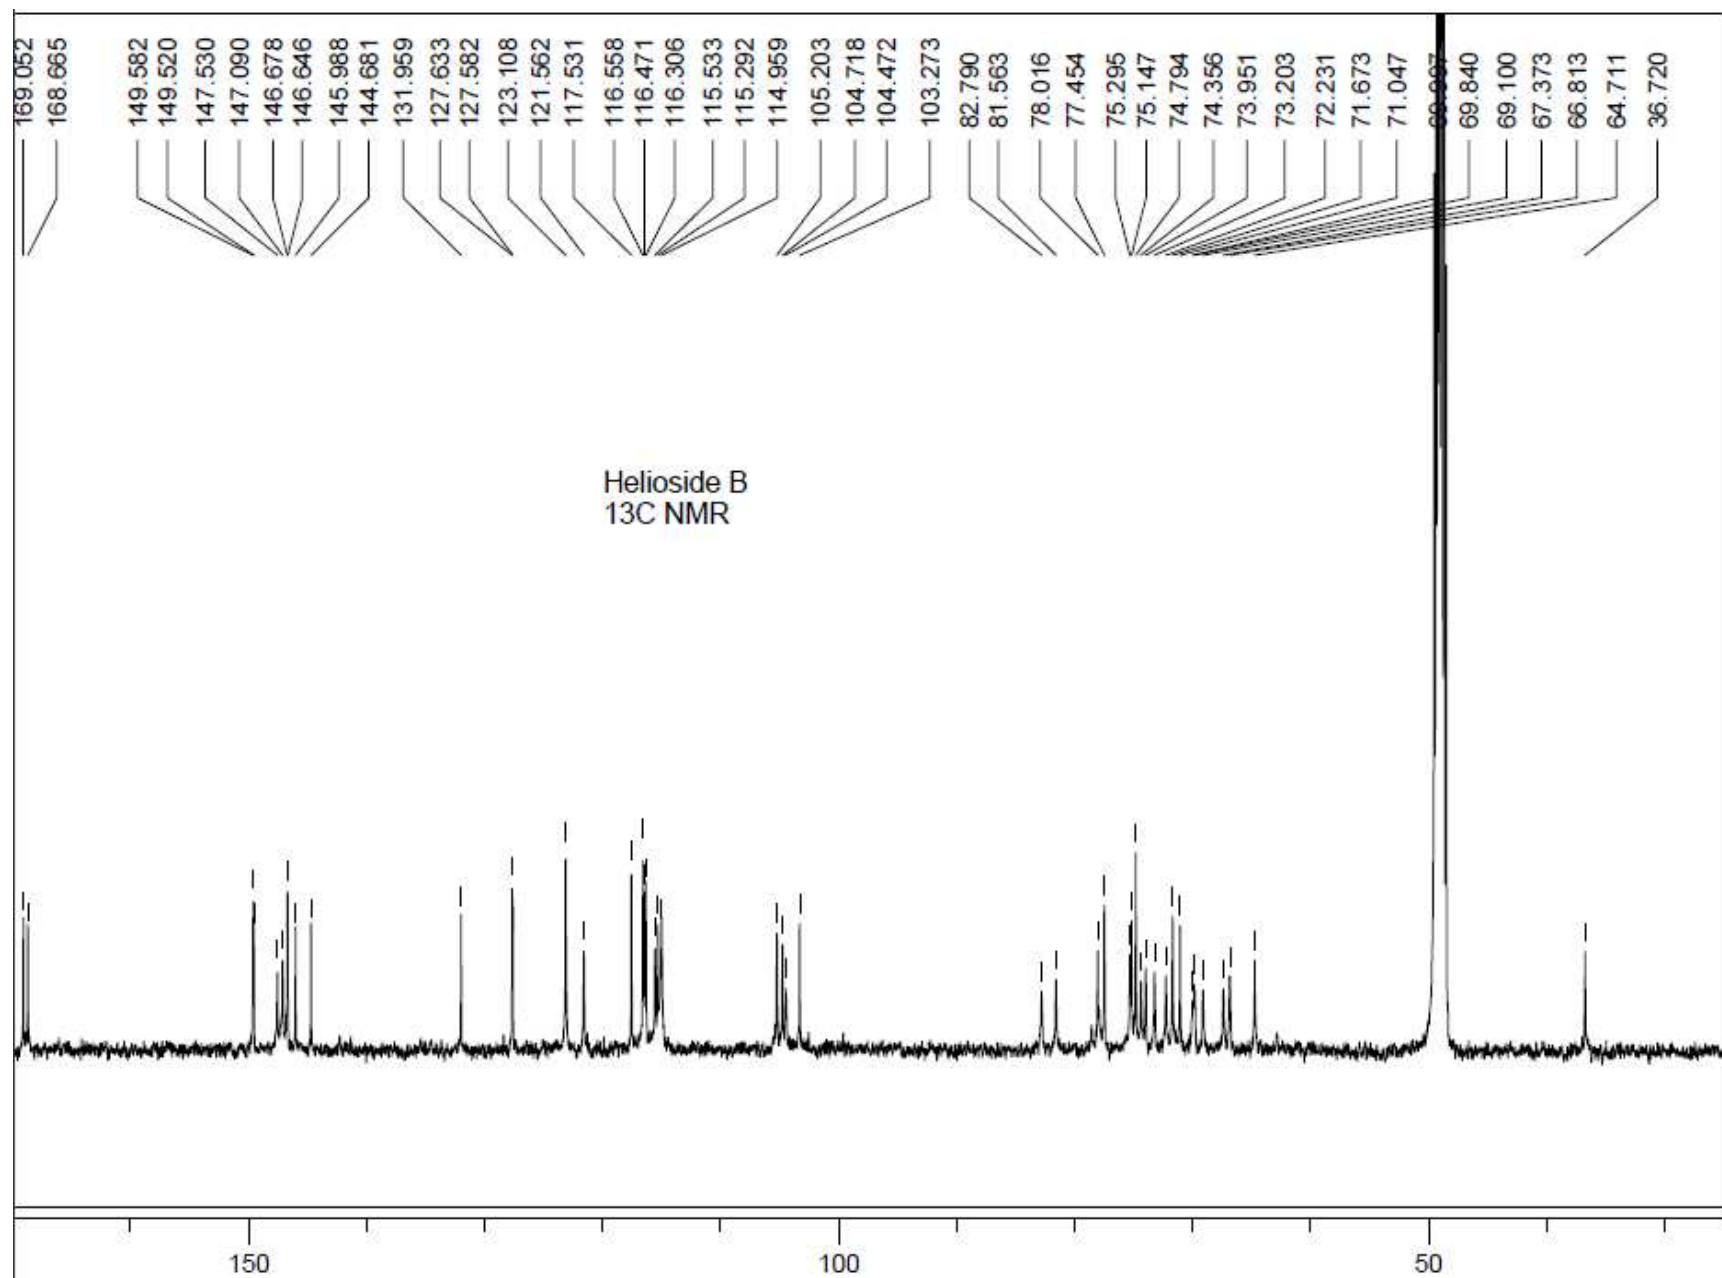

Figure S18.

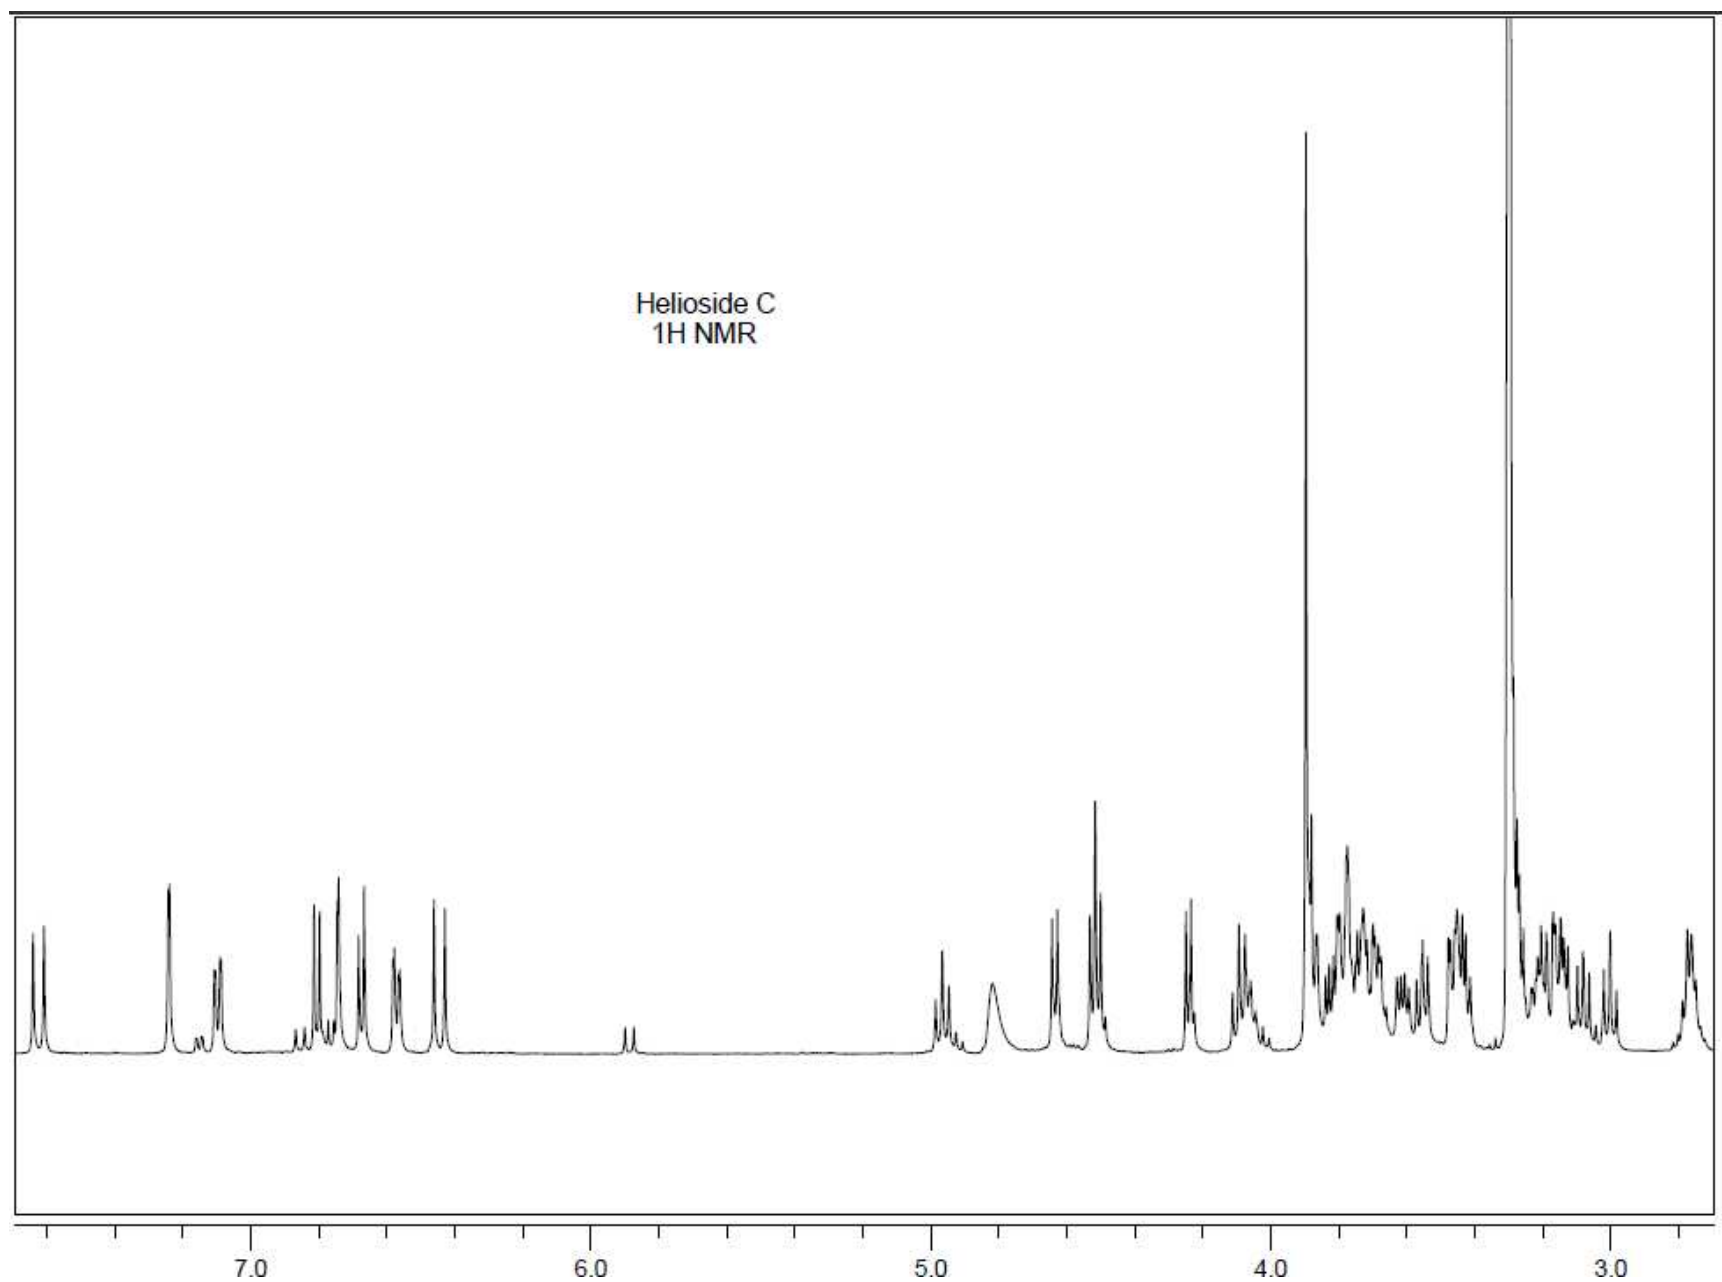

Figure S19.

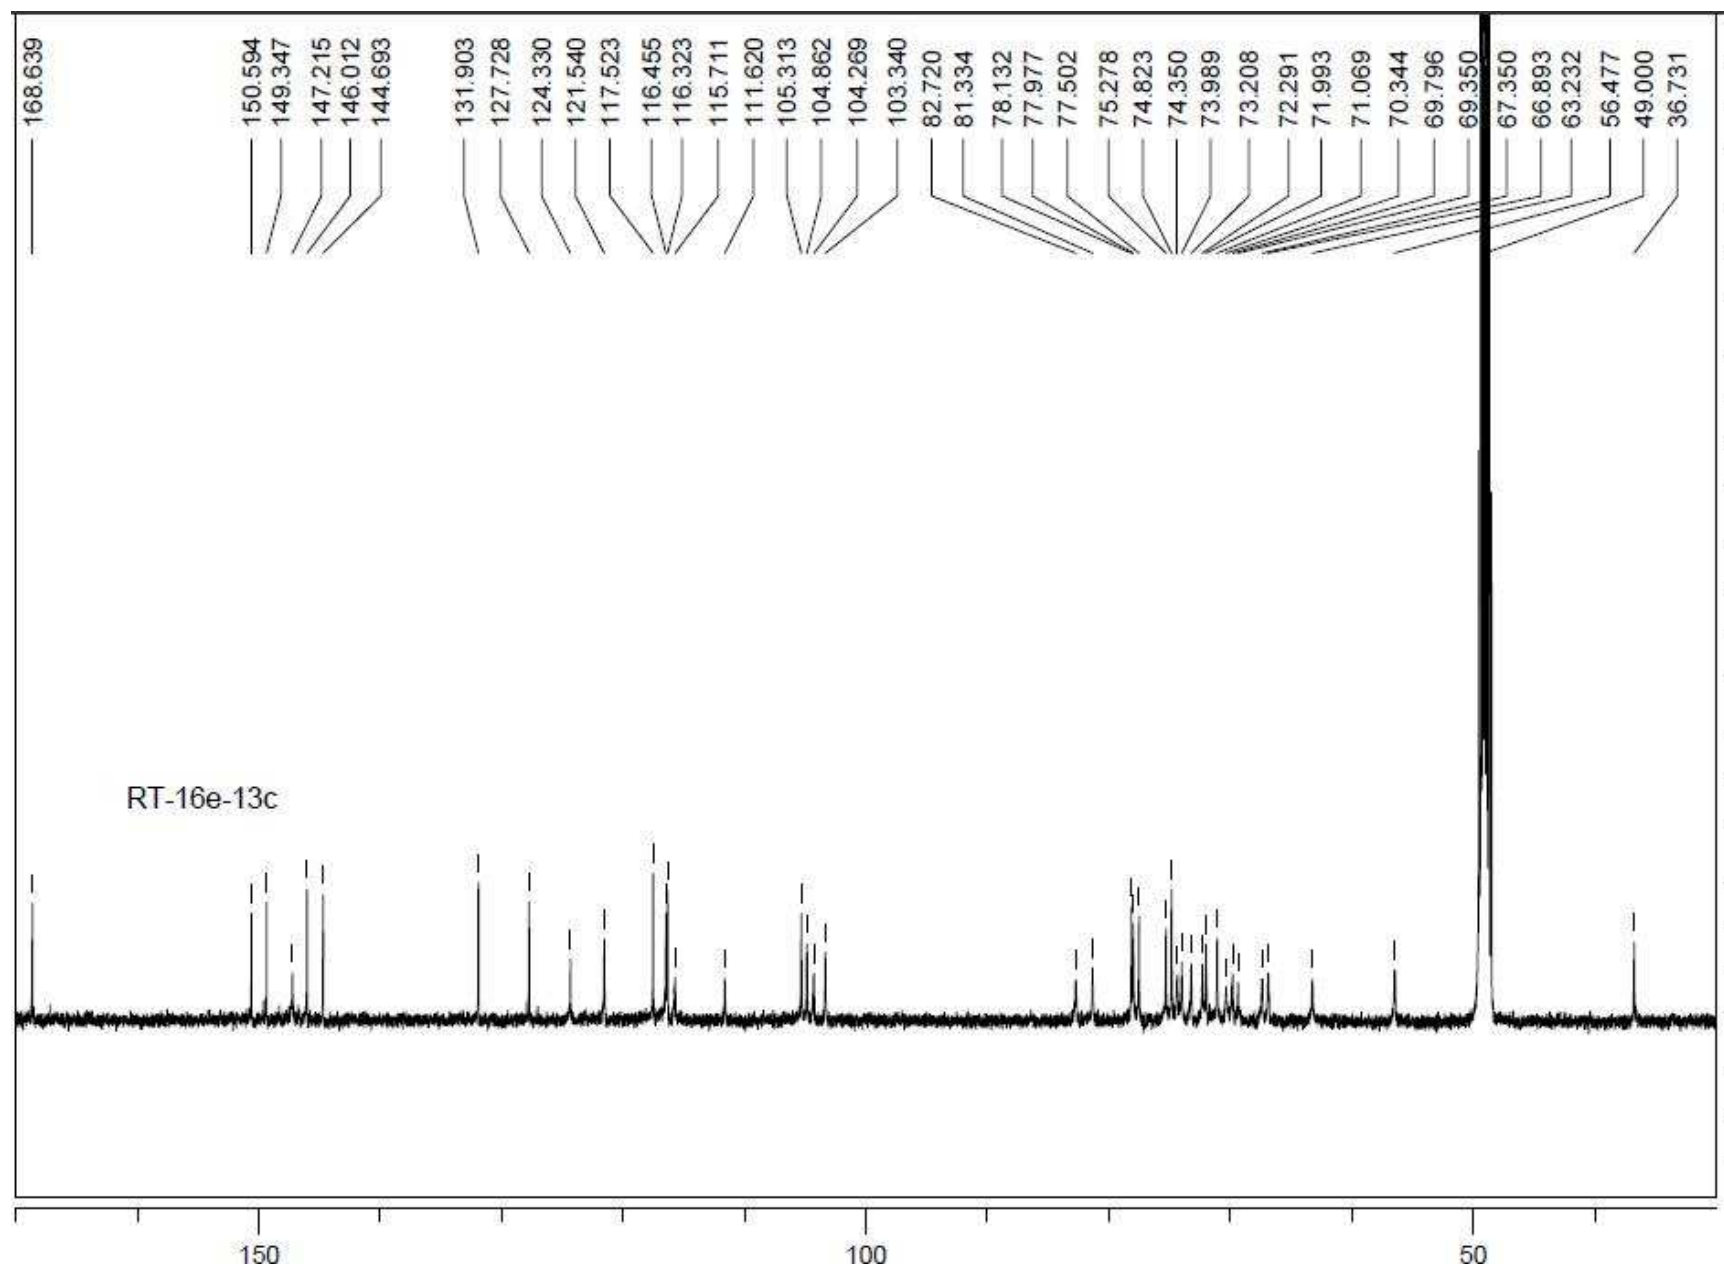

Figure S20.

$\beta$ -D-glucopyranosyl-(1 $\rightarrow$ 6)-mannitol (**5c**):  $[\alpha]_D^{24}$  - 18 (water; *c* 1.0). Nelson, T.A.; Lewis, B. A. *Carbohydrate Res.* **1974**, *33*, 63-74.

Globularitol (**5b**): Amorphous solid:  $[\alpha]_D^{20}$  - 22 (MeOH; *c* 0.1). Ref. 11.

Hebitol I (**5a**): Amorphous solid:  $[\alpha]_D^{20}$  - 15 (MeOH; *c* 0.14). Ref. 10.

Hebitol II (**5**): Amorphous solid:  $[\alpha]_D^{20}$  - 17 (MeOH; *c* 0.3). Ref. 10.
